# Supplementary material
Source: PubMed Central journal article supplement (PMC7135928)
Supplement: NIHMS1558065-supplement-Supplemental_Publication_Material.pdf [file NIHMS1558065-supplement-Supplemental_Publication_Material.pdf]

## **SUPPLEMENTAL MATERIAL**

### **Table of Contents**

- 1) Supplementary Materials and Methods
- 2) Supplementary Tables
- 3) Supplementary Figures
- 4) Supplementary Movies
- 5) Author Contributions

### **1. Supplementary Materials and Methods**

#### **Mice**

All animal procedures were performed according to protocols approved by the Icahn School of Medicine at Mount Sinai's Institutional Care and Use Committee. We used male and female CFW mice. Before surgery, mice were anesthetized with a cocktail of 100 mg/kg ketamine and 10 mg/kg xylazine. For the protein expression assay, we injected 100 µg of Luc, Sphk1 or S1pr2 modRNA in 60 µl citrate buffer directly into the myocardium during open-chest surgery, as described previously.<sup>27</sup> MI was induced by permanently ligating the LAD. The left thoracic region was shaved and sterilized. After intubation, the heart was exposed by left thoracotomy. The LAD was ligated with a suture. When required, we injected 100 µg modRNA into the infarct border zone immediately after LAD ligation. The thoracotomy and skin were sutured closed in layers.

Excess air was removed from the thoracic cavity, and the mouse was removed from ventilation when normal breathing was established. Hearts from sham-operated mice were collected immediately after open-heart surgery without LAD ligation.

### **ModRNA Synthesis**

Clean PCR products generated with plasmid templates (GeneArt, Thermo Fisher Scientific), were used as the template for mRNA (a complete list of the open reading frames used in this study is provided in **Supplementary Table 1**). ModRNAs were generated by transcription *in vitro* with a customized ribonucleoside blend of anti-reverse cap analog, 30-O-Me-m<sup>7</sup>G(50) ppp(50)G (6 mM, TriLink Biotechnologies); guanosine triphosphate (1.5 mM, Life Technologies); adenosine triphosphate (7.5 mM, Life Technologies); cytidine triphosphate (7.5 mM, Life Technologies) and N<sup>1</sup>-methylpseudouridine-5-triphosphate (7.5 mM, TriLink Biotechnologies). The mRNA was purified with the Megaclear kit (Life Technologies), and treated with Antarctic Phosphatase (New England Biolabs) and then repurified with the Megaclear kit. The mRNA was quantified on a Nanodrop spectrometer (Thermo Scientific), precipitated with ethanol and ammonium acetate and resuspended in 10 mM Tris-HCl and 1 mM EDTA. This protocol has been described in detail elsewhere.<sup>26</sup>

### ***In vitro* transfection with modRNA**

Using a 24-well plate, we complexed 2.5 µg per well of mRNA encoding nGFP, AC, Sphk1, Sphk2 or S1pr2 with RNAiMAX (Life Technologies) and used the resulting complex to transfect neonatal rat or hPSC-derived CMs in accordance with the instructions provided by the RNAiMAX manufacturer. For immunofluorescence staining,

cells were washed once with PBS 18 hours after transfection, then fixed by incubation for 10 minutes in 4% PFA and washed three times with PBS. For western blot analysis, cells were washed once with PBS and lysed with lysis buffer (Sigma). To induce cell death by hypoxia, cells were placed in a hypoxia chamber for 48 hours and then harvested by treating the plates with 0.25% trypsin (Sigma) for FACS analysis.

### **Neonatal rat CM isolation**

Neonatal rat ventricular CMs were isolated from three- to four-day-old Sprague-Dawley rats (Jackson ImmunoResearch Laboratories) via multiple rounds of digestion with 0.1% collagenase II (Invitrogen) in PBS. After each digestion, the supernatant was collected in horse serum (Invitrogen). The total cell suspension was centrifuged at 300 x *g* for 5 minutes. The supernatants were discarded and cells were resuspended in DMEM (Gibco) supplemented with 0.1 mM ascorbic acid (Sigma), 0.5% insulin-transferrin-selenium (100x), penicillin (100 U/mL) and streptomycin (100 mg/mL). Cells were plated in plastic culture dishes for 90 minutes until most of the non-myocytes were attached to the dish whilst the myocytes remained in suspension. Myocytes were then used to seed 24-well plates at a density of  $1 \times 10^5$  cells/well. Neonatal rat CMs were incubated for 48 hours in DMEM supplemented with 5% horse serum and then transfected with modRNAs, as described above.

## **RNA isolation**

Total RNA was isolated with the RNeasy mini kit (QIAGEN) and DNA was degraded by treatment with TURBO DNase (Invitrogen).

## **Real-time qPCR analyses**

Total RNA was reverse-transcribed with Superscript III reverse transcriptase (Invitrogen), according to the manufacturer's instructions. Real-time qPCR analyses were performed on a Mastercycler Realplex 4 Sequence Detector (Eppendorf) with the HotStart-IT SYBR Green qPCR master mix (x2) (Affymetrix). Data were normalized relative to 18srRNA or GAPDH. Fold-changes in gene expression were determined by the ddCT method. The PCR primer sequences are listed in **Supplementary Table 8**.

## **RNA sequencing**

The Epigenomics Core at Cornell Medical College prepared poly(A)-tailed RNA with the mRNA Seq Sample Prep Kit (Illumina) and then created libraries for HiSeq2000 sequencing (Illumina). We used single 50 bp reads for sequencing. We obtained a mean of 30 million reads per sample, with a mean quality score of 35.2. We used Partek flow software for data analysis. RNA-Seq reads were aligned to mm10 with STAR version 2.53a. Read counts were generated by applying the Partek E/M algorithm to UCSC RefSeq 2017-08-02. Counts were normalized with TMM algorithm and the Partek flow GSA algorithm was used for statistical analysis of the pathways altered in the heart post MI. We used the enricher tool for gene ontology (GO) analysis using the Fisher exact test with gene set terms from KEGG pathways database. The RNSseq data used in this study are available using accession # GSE138201.

## **Western blotting**

Heart lysates were thawed and subjected to SDS-PAGE in 12% precast Nupage Bis/Tris gels (Invitrogen) under reducing conditions in MES running buffer (Invitrogen). The resulting bands were transferred onto a nitrocellulose membrane (Bio-Rad) by blotting in a semidry transfer apparatus with Nupage-MOPS transfer buffer (Invitrogen). The membrane was blocked by incubation with TBS/Tween containing 5% dry milk powder and incubated with specific primary antibodies overnight at 40°C. It was then washed in TBS/Tween and incubated with rabbit or goat secondary antibodies conjugated to horseradish peroxidase for 1 hour at room temperature. Antibody binding was detected with an enhanced chemiluminescence (ECL) detection system (Pierce). We used prestained protein standards (Amersham) to determine molecular weight. A complete list of the antibodies used in this study is provided in **Supplementary Table 8**.

## ***In vivo* inhibitor assay**

0.1ml of ARN14974 in DNSO (10mg/ml) or DMSO was mixed with 15% polyethylene glycol, 15% Tween-80 and 70% saline to get a final concentration of 1mg/ml. 10 ml/kg (10mg/kg) was injected IP at the time of LAD ligation and 7 hours post ligation. 24 hours post LAD ligation, hearts were harvested, fixed and stained with TUNEL to assess cell death levels in the LV.

## ***In vitro* inhibitor assays**

All inhibitors were dissolved in DMSO, ARN14974 and B13 10mg/ml, SK1-II 5mg/ml. The inhibitors were added to nrCM media to assess their effect on cell death 24 and 48 hours later under either normal or anoxic conditions. The following chemical inhibitors of AC and Sphk were used: B13 (Echelon, (1R,2R)-B13, CAY10466) targeting AC), ARN14974 (Cayman Chemical, (Acid ceramidase inhibitor 17a) targeting AC), SK1-II (Millipore Sigma, (2-(p-Hydroxyanilino)-4-(p-chlorophenyl) thiazole, HCl, SK Inhibitor I) targeting Sphingosine kinase).

### **Analyzing sphingolipid composition**

Mass spectrometry was used to determine the sphingolipid composition of frozen mouse hearts crushed with a pestle; both had been stored at -80°C. The powdered heart was transferred to cold Eppendorf tubes and snap frozen in liquid N<sub>2</sub>. Small volumes of Tris (20 mM, pH = 7.8) were added to the tubes, which were then subjected to sonication (10 min, 4°C) for protein and lipid extraction. The tubes were centrifuged to remove the solid material, and the supernatants were transferred to clean tubes.

Aliquots containing the equivalent of 1 mg total protein, (BCA protein assay, Pierce™ A53226, 560 nM) were subjected to sphingolipid analysis in conical flasks (15 mL).

Extraction solution (2 mL, ethyl acetate:isopropanol:water = 5:2.3:1) and internal standards (50 µL, Stony Brook) were added to the flasks, which were then sonicated (3 seconds), vortexed (1 minute) and centrifuged (5 minutes at 600 x g). Extracts were transferred to glass test tubes and a second extraction procedure was performed. The solvent was removed at 37°C under a stream of N<sub>2</sub> gas. Samples were resuspended in 150 µL of mobile phase B (methanol, formic acid (0.2%) and ammonium formate (1 mM)

for analysis, following the previously published method,<sup>62</sup> at the Stony Brook Lipidomics facility.

### **AC activity assay**

AC activity in heart tissue lysate was analyzed by HPLC-MS/MS. Briefly, the lysate was incubated in AC buffer with N-palmitoyl ceramide-D31 (PCD, Avanti Lipids®-868516). This ceramide was selected for these assays in order to monitor palmitic acid-D31 (PAD) production without interference from the palmitic acid ( $m/z = 255.2$ ) ubiquitously detected in negative mode. The reaction was quenched and the proteins were simultaneously precipitated. The proteins were removed by centrifugation and the supernatant was transferred to a sample vial for analysis, which was performed on an HPLC machine connected to a MS/MS detector-monitoring PAD in negative mode. PAD (Sigma®-68277) was quantified with an 18-point calibration curve (2 to 100 nM) in assay conditions. Samples without proteins or without substrate were analyzed as negative controls. The heart apex was lysed in Cytobuster™ (Millipore®-71009) lysis buffer. The resulting suspension was subjected to sonication and centrifuged (300 x *g*, 10 minutes, 4°C). The supernatants were used as total protein lysates (3.8 µg/µL). Aqueous solutions of sodium citrate (Sigma®-71402, 25 mL, 400 mM); sodium phosphate (Sigma®-S5136, 25 mL, 400 mM); citric acid (Sigma®-C0706, 50 mL, 300 mM) and NaCl (100 mL, 300 mM) were prepared and mixed to generate the AC buffer (50 mM sodium citrate, 50 mM sodium phosphate, 75 mM citric acid, 150 mM NaCl, pH = 4.5). For the AC assay, PCD (8.5 µL, 2.5 mM) was added to a tube and the solvent was evaporated off in a Speedvac™. PCD was reconstituted in Nonidet™ P40 (Sigma®- 98379, 2 µL, 10% in H<sub>2</sub>O); FBS (1 µL) and AC-buffer (97 µL) to produce the

PCD stock (213.3  $\mu$ M). PCD stock (15  $\mu$ L) and cell lysate (5  $\mu$ L) were combined to constitute the reaction mixture (PCD 160  $\mu$ M, 0.2% Nonidet, 0.75% FBS), which was then incubated at 37°C for 24 hours. A solution of acetonitrile:ethanol (1:1, 80  $\mu$ L) was used to quench the reaction and precipitate proteins. The tube was centrifuged (450 x *g*, 10 minutes), and the supernatant was transferred to a sample vial for injection. Three controls were used: protein controls in Cytobuster™ lysis buffer free of extract with and without PCD stock solution, a substrate control consisting of cell lysate and a control stock solution without PCD. For HPLC-MS/MS conditions, chromatography was performed on an HPLC machine (Shimadzu®) equipped with two pumps (LC20AD), an autosampler (SIL20AC, 25  $\mu$ L injection volume, 15°C) and a column oven (CTO20AC, 40°C) containing a Luna-C18(2) column (Phenomenex®-00D-4252-B0, 100 Å, 5  $\mu$ m, 100 x 2 mm) equipped with a guard column (Phenomenex®-AJ0-7606). The solvents used were mixtures of acetonitrile:water:isopropanol (A = 10:88:2, B = 93:5:2) supplemented with ammonium formate (10 mM). We used a normal flow rate (1.0 mL/min) with scheduled changes to the percentage of solvent B (0% isocratic for 0-1 min, 1-100% gradient over 1-4 min, 100% isocratic for 4-7.5 min and 0% isocratic for 7.5-9.5 min for post-equilibration). The detector (Sciex® 5500) was optimized for electrospray ionization of PAD ( $t$  = 5.1 min, MRM = 286.4-286.4, CUR = 35, CAD = Low, IS = -4500 V, TEM = 200°C, GS1 = 40, GS2 = 60, EP = -10 V, DP = -150 V, CE = -13 V, CXP = -18 V) in negative mode. Analyst® software (1.6.3, build 1569) was used for quantification.

## **Immunofluorescence**

Mouse hearts were harvested and perfused with 4% paraformaldehyde (PFA) in perfusion buffer. Hearts were fixed by overnight incubation in 4% PFA/PBS on a shaker and then washed with PBS for 1 h and incubated in 30% sucrose in PBS at 4°C overnight. Before freezing, hearts were mounted in OCT with polymerization for 30 min. They were then frozen at -80°C. Transverse 10 µm heart sections were cut with a cryostat. These cryosections were washed in PBST and blocked by incubation for 1 h with 5% donkey serum in PBST. Sections were incubated overnight at 4°C with primary antibodies against troponin I, Sphk1 and S1p2. Antibody binding was detected by incubation with fluorescent secondary antibodies (Jackson ImmunoResearch Laboratories). TUNEL staining was performed according to the kit manufacturer's instructions (In-Situ Cell Death Detection Kit, Fluorescein, Cat# 11684795910, Roche). Stained sections were imaged with a Zeiss Slide Scanner on an Axio Scan or Zeiss microscope. TUNEL quantification was then performed on the heart sections with ImageJ software.

For cell immunocytochemistry, isolated CMs were fixed on coverslips by incubation with 4% PFA for 10 minutes at room temperature. Following permeabilization with 0.1% Triton X-100 in PBS for 10 minutes at room temperature, cells were blocked by incubation with 5% donkey serum + 0.1% Triton X-100 in PBS for 30 minutes. Coverslips were incubated with primary antibodies in a damp chamber for 1 hour at room temperature and then with the corresponding secondary antibodies conjugated to Alexa Fluor 488, Alexa Fluor 647 and Alexa Fluor 555, and Hoechst 33342 staining was performed to visualize nuclei (all reagents from Invitrogen). Fluorescence images were

obtained with Zeiss fluorescence microscope at a magnification of 20x. A complete list of the antibodies used in this study is provided in Supplementary Table 2.

### **Magnetic resonance imaging (MRI)**

In a double-blind study (treatment unknown to both the surgeon and the MRI or echography technician), CFW mice (8 weeks old) treated with Luc or AC modRNA were subjected to MRI assessment on day 28 post LAD ligation.<sup>17</sup> We obtained delayed-enhancement CINE images on a 7-T Bruker Pharmascan with cardiac and respiratory gating (SA Instruments). Mice were anesthetized with 1-2% isoflurane in air. ECG, respiratory and temperature probes were placed on the mouse, which was kept warm during scans. Imaging was performed 10 to 20 minutes after IV injection of 0.3 mmol/kg gadolinium-diethylene triamine pentaacetic acid. A stack of eight to ten short-axis heart slices, spanning the apex to the base, were acquired with an ECG-triggered and respiratory-gated FLASH sequence with the following parameters: echo time (TE) 2.7 ms with a resolution of 200  $\mu$ m x 200  $\mu$ m; 1 mm slice thickness; 16 frames per R-R interval; 4 excitations with a flip angle of 60°. All DICOM images were loaded into the freely available SEGMENT (<http://medviso.com/segment/>) cardiac MRI software package. The short-axis and long-axis CINE set series were analyzed for dimensions, volumes, ejection fraction, mass, regional function and chamber indices by an experienced user blind to treatment group. For regional analysis, the heart was divided into four sectors: the anterior, lateral, posterior and septal regions. The MI area was defined as the middle to apical left ventricular anterior wall region, with the anteroseptal region as the adjacent border zone.

## **Echocardiography (Echo)**

In a double-blind study (treatment group unknown to both the surgeon and the MRI or echography technician), CFW mice (8 weeks old) treated with Luc, AC, Sphk1 or AC+Sphk1 modRNAs were treated with Ketamine (50µl per 25g body weight, ketamine concentration 25mg/ml), placed on heating pad and evaluated for heart rate while restrained on a platform with tape. Mice with heart rates between 550-600bpm were subjected to echographic assessments on days 2 and 28 post LAD ligation. Heart function parameters were acquired with a Vivid 7 Dimension (GE Healthcare) machine equipped with an i13L probe set to a frequency of 12 MHz. Fractional shortening was calculated from the dimensions at the end of diastole and systole.

## **hiPSCs differentiation to hiCMs**

The source of the hiPSCs is Adult Human Dermal Fibroblast - P13 (ScienCell Research Laboratories - #2320). The cell line has been reprogrammed by Stemgent mRNA and has a normal female karyotype. hiPSCs were induced into cardiac lineage differentiation as previously described.<sup>63</sup> Briefly, hiPSCs were maintained in E8 media and passaged every 4 to 5 days on Matrigel-coated plates. We generated embryoid bodies (EBs) by treating hiPSCs with 1 mg/ml collagenase B (Roche) for 30 minutes or until the cells dissociated from the plates. Cells were collected by centrifugation at 250 x *g* for 3 minutes and resuspended in small clusters of 50-100 cells by gentle pipetting in differentiation medium containing RPMI (Gibco), 2 mmol/L L-glutamine (Invitrogen), 4 x 10<sup>5</sup> monothioglycerol (MTG, Sigma), 50 mg/mL ascorbic acid (Sigma) and 150 mg/mL transferrin (Roche). The differentiation medium was supplemented with 2 ng/mL BMP4

and 3 mmol thiazovivin (Millipore) (day 0). EBs were maintained in six-well ultra-low attachment plates (Corning) at 37°C under an atmosphere containing 5% CO<sub>2</sub>, 5% O<sub>2</sub> and 90% N<sub>2</sub>. On day 1, the medium was replaced with a differentiation medium supplemented with 20 ng/mL BMP4 (R&D Systems) and 20 ng/mL activin A (R&D Systems). On day 4, the medium was replaced with differentiation medium supplemented with 5 ng/mL VEGF (R&D Systems) and 5 mmol/L XAV (Stemgent). After day 8, the medium was replaced every 5 days with differentiation medium without supplements.

### **Flow cytometry**

Digestion and staining protocols are as previously published<sup>29</sup> with a few modifications. At 2, 7 and 14 days post MI, hearts of Luc modRNA- or AC modRNA-treated mice were perfused using 10ml of ice-cold PBS. Infarct zones were collected and minced in 1ml of digestion mix containing 3.7 µl DNase (Sigma, D5319); 5 µl Hyaluronidase (12000 U/ml, Sigma, H3506); 10µl Collagenase XI (12500 U/ml, Sigma, C7657); 20 µl HEPES buffer (1M, Corning, 25-060-CI) and 45 µl of Collagenase I (10000 U/ml, Sigma, C0130) in DPBS and incubated for 1 h at 37°C with agitation (750rpm). Next, cell suspension was triturated and filter through 40µm-cell strainer using FACS buffer (0.5% BSA in PBS) and centrifuged at 340 x g for 7 min at 4°C. Prior to first staining, Purified Rat Anti-Mouse CD16/CD32 (Mouse BD Fc Block) was added into cell suspension (1µl per 1\*10<sup>6</sup> cells) and incubated for 5 min at RT following by an antibody mix (B220/CD45R, CD19, CD3, CD90.2, CD49b, CD103, NK-1.1, TER-119 (Biolegend) at 1:300) and incubated on ice for 30min. After washing, second staining was performed for 30 min on ice using

CD11b-APC, CD45-Alexa Fluor 700, F4/80-PE-Cy7, Ly6C-BV510, Ly6G-FITC and MHCII-PE at 1:300 (Biolegend). DAPI, used to mark viable cells, was added to the samples 15 min before acquisition. Data were acquired using AURORA (Cytex) Spectral Flow Cytometer and analyzed using FlowJo software. A detailed list of antibodies is available in Supplementary Table 2, and the gating strategy is shown in Figure 5G.

## **2. Supplementary Tables**

**Table 1.** Open reading frame sequences used to generate modRNA.

| Gene | Open reading frame                                                                                                                                                                                                                                                                                                                                                                                                                                                                                                                                                                                                                                                                                                                                                                                                                                                                                                                                                                                                                                                                                                                                                            |
|------|-------------------------------------------------------------------------------------------------------------------------------------------------------------------------------------------------------------------------------------------------------------------------------------------------------------------------------------------------------------------------------------------------------------------------------------------------------------------------------------------------------------------------------------------------------------------------------------------------------------------------------------------------------------------------------------------------------------------------------------------------------------------------------------------------------------------------------------------------------------------------------------------------------------------------------------------------------------------------------------------------------------------------------------------------------------------------------------------------------------------------------------------------------------------------------|
| ACv1 | ATGCCGGGCGCGGAGTTGCGTCGCCTTAGTCCTCCTGGCTGCCGCCG<br>TCAGCTGTGCCGTGCGGCAGCACGCGCCGCCGTGGACAGAGGACTG<br>CAGAAAATCAACCTATCCTCCTTCAGGACCAACGTACAGAGGTGCAGT<br>TCCATGGTACACCATAAATCTTGACTTACCACCCTACAAAAGATGGCA<br>TGAATTGATGCTTGACAAGGCACCAGTGCTAAAGGTTATAGTGAATTC<br>TCTGAAGAATATGATAAATACATTCGTGCCAAGTGGAAAAATTATGCA<br>GGTGGTGGATGAAAAATTGCCTGGCCTACTTGGCAACTTTCCTGGCC<br>CTTTTGAAGAGGAAATGAAGGGTATTGCCGCTGTTACTGATATACCTT<br>TAGGAGAGATTATTTCAATCAATATTTTTTATGAATTATTTACCATTTGT<br>ACTTCAATAGTAGCAGAAGACAAAAAAGGTCATCTAATACATGGGAGA<br>AACATGGATTTTGGAGTATTTCTTGGGTGGAACATAAATAATGATACCT<br>GGGTCATAACTGAGCAACTAAAACCTTTAACAGTGAATTTGGATTTCC<br>AAAGAAACAACAAAACGTCTTCAAGGCTTCAAGCTTTGCTGGCTATG<br>TGGGCATGTTAACAGGATTCAAACCAGGACTGTTCAAGTCTTACACTGA<br>ATGAACGTTTCAGTATAAATGGTGGTTATCTGGGTATTCTAGAATGGA<br>TTCTGGGAAAGAAAGATGTCATGTGGATAGGGTTCCTCACTAGAACAG<br>TTCTGGAAAATAGCACAAGTTATGAAGAAGCCAAGAATTTATTGACCA<br>AGACCAAGATATTGGCCCCAGCCTACTTTATCCTGGGAGGCAACCAG<br>TCTGGGGAAGGTTGTGTGATTACACGAGACAGAAAGGAATCATTGGA<br>TGTATATGAACTCGATGCTAAGCAGGGTAGATGGTATGTGGTACAAAC<br>AAATTATGACCGTTGGAAACATCCCTTCTTCCTTGATGATCGCAGAAC<br>GCCTGCAAAGATGTGTCTGAACCGCACCAAGAGAATATCTCATT |

|       |                                                                                                                                                                                                                                                                                                                                                                                                                                                                                                                                                                                                                                                                                                                                                                                                                                                                                                                                                                                                                                                                                                                                                         |
|-------|---------------------------------------------------------------------------------------------------------------------------------------------------------------------------------------------------------------------------------------------------------------------------------------------------------------------------------------------------------------------------------------------------------------------------------------------------------------------------------------------------------------------------------------------------------------------------------------------------------------------------------------------------------------------------------------------------------------------------------------------------------------------------------------------------------------------------------------------------------------------------------------------------------------------------------------------------------------------------------------------------------------------------------------------------------------------------------------------------------------------------------------------------------|
|       | TGAAACCATGTATGATGTCCTGTCAACAAACCTGTCCTCAACAAGCT<br>GACCGTATACACAACCTTGATAGATGTTACCAAAGGTCAATTCGAAAC<br>TTACCTGCGGGACTGCCCTGACCCTTGTATAGGTTGGTGA                                                                                                                                                                                                                                                                                                                                                                                                                                                                                                                                                                                                                                                                                                                                                                                                                                                                                                                                                                                                         |
| Sphk1 | ATCCAGTGGTCGGTTGCGGACGTGGCCTCTTTGGTTTTGTTTTCTCAG<br>CGGGCGGCCCCCGGGGCGTGCTCCCGCGGCCCTGCCGCGTGCTGG<br>TGCTGCTGAACCCGCGCGGGCGGCAAGGGCAAGGCCTTGCAGCTCTT<br>CCGGAGTCACGTGCAGCCCCCTTTGGCTGAGGCTGAAATCTCCTTCA<br>CGCTGATGCTCACTGAGCGGCGGAACCACGCGCGGGAGCTGGTGCG<br>GTCGGAGGAGCTGGGCCGCTGGGACGCTCTGGTGGTCATGTCTGGA<br>GACGGGCTGATGCACGAGGTGGTGAACGGGCTCATGGAGCGGCCTG<br>ACTGGGAGACCGCCATCCAGAAGCCCCTGTGTAGCCTCCCAGCAGG<br>CTCTGGCAACGCGCTGGCAGCTTCCTTGAACCATTATGCTGGCTATG<br>AGCAGGTCACCAATGAAGACCTCCTGACCAACTGCACGCTATTGCTG<br>TGCCGCCGGCTGCTGTCACCCATGAACCTGCTGTCTCTGCACACGGC<br>TTCGGGGCTGCGCCTCTTCTCTGTGCTCAGCCTGGCCTGGGGCTTCA<br>TTGCTGATGTGGACCTAGAGAGTGAGAAGTATCGGCGTCTGGGGGAG<br>ATGCGCTTCACTCTGGGCACCTTCCTGCGTCTGGCAGCCCTGCGCAC<br>CTACCGCGGCCGACTGGCCTACCTCCCTGTAGGAAGAGTGGGTTCCA<br>AGACACCTGCCTCCCCCGTTGTGGTCCAGCAGGGCCCCGGTAGATGC<br>ACACCTTGTGCCACTGGAGGAGCCAGTGCCCTCTCACTGGACAGTGG<br>TGCCCGACGAGGACTTTGTGCTAGTCCTGGCACTGCTGCACTCGCAC<br>CTGGGCAGTGAGATGTTTGCTGCACCCATGGGCCGCTGTGCAGCTG<br>GCGTCATGCATCTGTTCTACGTGCGGGCGGGAGTGTCTCGTGCCATG<br>CTGCTGCGCCTCTTCCTGGCCATGGAGAAGGGCAGGCATATGGAGTA<br>TGAATGCCCTACTTGGTATATGTGCCCGTGGTCGCCTTCCGCTTGG |

|       |                                                                                                                                                                                                                                                                                                                                                                                                                                                                                                                                                                                                                                                                                                                                                                                                                                                                                                                                                                                                                                                                                             |
|-------|---------------------------------------------------------------------------------------------------------------------------------------------------------------------------------------------------------------------------------------------------------------------------------------------------------------------------------------------------------------------------------------------------------------------------------------------------------------------------------------------------------------------------------------------------------------------------------------------------------------------------------------------------------------------------------------------------------------------------------------------------------------------------------------------------------------------------------------------------------------------------------------------------------------------------------------------------------------------------------------------------------------------------------------------------------------------------------------------|
|       | AGCCCAAGGATGGGAAAGGTGTGTTTGCAGTGGATGGGGAATTGATG<br>GTTAGCGAGGCCGTGCAGGGCCAGGTGCACCCAACTACTTCTGGAT<br>GGTCAGCGGTTGCGTGGAGCCCCCGCCCAGCTGGAAGCCCCAGCAG<br>ATGCCACCGCCAGAAGAGCCCTTATATG                                                                                                                                                                                                                                                                                                                                                                                                                                                                                                                                                                                                                                                                                                                                                                                                                                                                                                         |
| Sphk2 | ATGAATGGACACCTTGAAGCAGAGGAGCAGCAGGACCAGAGGCCAG<br>ACCAGGAGCTGACCGGGAGCTGGGGCCACGGGCCTAGGAGCACCCCT<br>GGTCAGGGCTAAGGCCATGGCCCCGCCCCACCGCCACTGGCTGCC<br>AGCACCCCGCTCCTCCATGGCGAGTTTGGCTCCTACCCAGCCCGAG<br>GCCACGCTTTGCCCTCACCTTACATCGCAGGCCCTGCACATACAG<br>CGGCTGCGCCCCAAACCTGAAGCCAGGCCCGGGGTGGCCTGGTCC<br>CGTTGGCCGAGGTCTCAGGCTGCTGCACCCTGCGAAGCCGCAGCCC<br>CTCAGACTCAGCGGCCTACTTCTGCATCTACACCTACCCTCGGGGCC<br>GGCGCGGGGCCCCGGCGCAGAGCCACTCGCACCTTCCGGGCAGATG<br>GGGCCGCCACCTACGAAGAGAACCGTGCCGAGGCCCAGCGCTGGG<br>CCACTGCCCTCACCTGTCTGCTCCGAGGACTGCCACTGCCCGGGGAT<br>GGGGAGATCACCCCTGACCTGCTACCTCGGCCGCCCCGGTTGCTTCT<br>ATTGGTCAATCCCTTTGGGGGTGCGGGCCTGGCCTGGCAGTGGTGTA<br>AGAACCACGTGCTTCCCATGATCTCTGAAGCTGGGCTGTCCTTCAAC<br>CTCATCCAGACAGAACGACAGAACCACGCCCCGGGAGCTGGTCCAGG<br>GGCTGAGCCTGAGTGAGTGGGATGGCATCGTCACGGTCTCGGGAGA<br>CGGGCTGCTCCATGAGGTGCTGAACGGGCTCCTAGATCGCCCTGACT<br>GGGAGGAAGCTGTGAAGATGCCTGTGGGCATCCTCCCCTGCGGCTC<br>GGGCAACGCGCTGGCCGGAGCAGTGAACCAGCACGGGGGATTTGAG<br>CCAGCCCTGGGCCTCGACCTGTTGCTCAACTGCTCACTGTTGCTGTG<br>CCGGGGTGGTGGCCACCCACTGGACCTGCTCTCCGTGACGCTGGCC |

|       |                                                                                                                                                                                                                                                                                                                                                                                                                                                                                                                                                                                                                                                                                                                                                                                                                                                                                                                                                                                                                                                                                                                        |
|-------|------------------------------------------------------------------------------------------------------------------------------------------------------------------------------------------------------------------------------------------------------------------------------------------------------------------------------------------------------------------------------------------------------------------------------------------------------------------------------------------------------------------------------------------------------------------------------------------------------------------------------------------------------------------------------------------------------------------------------------------------------------------------------------------------------------------------------------------------------------------------------------------------------------------------------------------------------------------------------------------------------------------------------------------------------------------------------------------------------------------------|
|       | TCGGGCTCCCGCTGTTTCTCCTTCCTGTCTGTGGCCTGGGGCTTCGT<br>GTCAGATGTGGATATCCAGAGCGAGCGCTTCAGGGCCTTGGGCAGT<br>GCCCCGCTTCACACTGGGCACGGTGCTGGGCCTCGCCACACTGCACA<br>CCTACCGCGGACGCCTCTCCTACCTCCCCGCCACTGTGGAACCTGCC<br>TCGCCCACCCCTGCCCATAGCCTGCCTCGTGCCAAGTCGGAGCTGAC<br>CCTAACCCCAGACCCAGCCCCGCCCATGGCCCACTCACCCCTGCATC<br>GTTCTGTGTCTGACCTGCCTCTTCCCCTGCCCCAGCCTGCCCTGGCC<br>TCTCCTGGCTCGCCAGAACCCCTGCCCATCCTGTCCCTCAACGGTGG<br>GGGCCCAGAGCTGGCTGGGGACTGGGGTGGGGCTGGGGATGCTCC<br>GCTGTCCCCGGACCCACTGCTGTCTTCACCTCCTGGCTCTCCCAAGG<br>CAGCTCTACACTCACCCGTCTCCGAAGGGGGCCCCCGTAATTCCCCCA<br>TCCTCTGGGCTCCCCTTCCCACCCCTGATGCCCGGGTAGGGGCCTC<br>CACCTGCGGGCCCGCCCGACCACCTGCTGCCTCCGCTGGGCACCCCG<br>CTGCCCCCAGACTGGGTGACGCTGGAGGGGGACTTTGTGCTCATGTT<br>GGCCATCTCGCCCAGCCACCTAGGCGCTGACCTGGTGGCAGCTCCG<br>CATGCGCGCTTCGACGACGGCCTGGTGCACCTGTGCTGGGTGCGTA<br>GCGGCATCTCGCGGGCTGCGCTGCTGCGCCTTTTCTTGGCCATGGA<br>GCGTGGTAGCCACTTCAGCCTGGGCTGTCCGCAGCTGGGCTACGCC<br>GCGGCCCCGTGCCTTCCGCCTAGAGCCGCTCACACCACGCGGCGTG<br>TCACAGTGGACGGGGAGCAGGTGGAGTATGGGCCGCTACAGGCACA<br>GATGCACCCTGGCATCGGTAACTGCTCACTGGGCCTCCTGGCTGCC<br>CGGGGCGGGAGCCCTGA |
| S1PR2 | ATGGGCAGCTTGTACTCGGAGTACCTGAACCCCAACAAGGTCCAGGA<br>AACTATAATTATACCAAGGAGACGCTGGAAACGCAGGAGACGACCT<br>CCCGCCAGGTGGCCTCGGCCTTCATCGTCATCCTCTGTTGCGCCATT                                                                                                                                                                                                                                                                                                                                                                                                                                                                                                                                                                                                                                                                                                                                                                                                                                                                                                                                                                   |

|                       |                                                                                                                                                                                                                                                                                                                                                                                                                                                                                                                                                                                                                                                                                                                                                                                                                                                                                                                                                                                                                                                                                    |
|-----------------------|------------------------------------------------------------------------------------------------------------------------------------------------------------------------------------------------------------------------------------------------------------------------------------------------------------------------------------------------------------------------------------------------------------------------------------------------------------------------------------------------------------------------------------------------------------------------------------------------------------------------------------------------------------------------------------------------------------------------------------------------------------------------------------------------------------------------------------------------------------------------------------------------------------------------------------------------------------------------------------------------------------------------------------------------------------------------------------|
|                       | <p> GTGGTGGAAAACCTTCTGGTGCTCATTGCGGTGGCCCGAAACAGCAA<br/> GTTCCACTCGGCAATGTACCTGTTTCTGGGCAACCTGGCCGCCTCCG<br/> ATCTACTGGCAGGCGTGGCCTTCGTAGCCAATACCTTGCTCTCTGGC<br/> TCTGTCACGCTGAGGCTGACGCCTGTGCAGTGGTTTGCCCGGGAGG<br/> GCTCTGCCTTCATCACGCTCTCGGCCTCTGTCTTCAGCCTCCTGGCC<br/> ATCGCCATTGAGCGCCACGTGGCCATTGCCAAGGTCAAGCTGTATGG<br/> CAGCGACAAGAGCTGCCGCATGCTTCTGCTCATCGGGGCCTCGTGG<br/> CTCATCTCGCTGGTCCTCGGTGGCCTGCCCATCCTTGGCTGGAAGT<br/> CCTGGGGCCACCTCGAGGCCTGCTCCACTGTCCTGCCTCTCTACGCCA<br/> AGCATTATGTGCTGTGCGTGGTGACCATCTTCTCCATCATCCTGTTGG<br/> CCATCGTGGCCCTGTACGTGCGCATCTACTGCGTGGTCCGCTCAAGC<br/> CACGCTGACATGGCCGCCCCGCAGACGCTAGCCCTGCTCAAGACGG<br/> TCACCATCGTGCTAGGCGTCTTTATCGTCTGCTGGCTGCCCGCCTTC<br/> AGCATCCTCCTTCTGGACTATGCCTGTCCCGTCCACTCCTGCCCGAT<br/> CCTCTACAAAGCCCACTACTTTTTCGCCGTCTCCACCCTGAATTCCT<br/> GCTCAACCCCGTCATCTACACGTGGCGCAGCCGGGACCTGCGGCGG<br/> GAGGTGCTTCGGCCGCTGCAGTGCTGGAGGCCGGGGGTGGGGGTG<br/> CAAGGACGGAGGCGGGGCGGGACCCCGGGCCACCACCTCCTGCCA<br/> CTCCGCAGCTCCAGCTCCCTGGAGAGGGGCATGCACATGCCACGT<br/> CACCCACGTTTCTGGAGGGCAACACGGTGGTCATG </p> |
| Firefly<br>luciferase | <p> ATGGCCGATGCTAAGAACATTAAGAAGGGCCCTGCTCCCTTCTACCC<br/> TCTGGAGGATGGCACCGCTGGCGAGCAGCTGCACAAGGCCATGAAG<br/> AGGTATGCCCTGGTGCCTGGCACCATTGCCTTCACCGATGCCACAT<br/> TGAGGTGGACATCACCTATGCCGAGTACTTCGAGATGTCTGTGCGCC<br/> TGGCCGAGGCCATGAAGAGGTACGGCCTGAACACCAACCACCGCAT </p>                                                                                                                                                                                                                                                                                                                                                                                                                                                                                                                                                                                                                                                                                                                                                                                                          |

|  |                                                                                                                                                                                                                                                                                                                                                                                                                                                                                                                                                                                                                                                                                                                                                                                                                                                                                                                                                                                                                                                                                                                                                                                                                                                                                                                                                                                |
|--|--------------------------------------------------------------------------------------------------------------------------------------------------------------------------------------------------------------------------------------------------------------------------------------------------------------------------------------------------------------------------------------------------------------------------------------------------------------------------------------------------------------------------------------------------------------------------------------------------------------------------------------------------------------------------------------------------------------------------------------------------------------------------------------------------------------------------------------------------------------------------------------------------------------------------------------------------------------------------------------------------------------------------------------------------------------------------------------------------------------------------------------------------------------------------------------------------------------------------------------------------------------------------------------------------------------------------------------------------------------------------------|
|  | <p> CGTGGTGTGCTCTGAGAACTCTCTGCAGTTCTTCATGCCAGTGCTGG<br/> GCGCCCTGTTTCATCGGAGTGGCCGTGGCCCCTGCTAACGACATTTAC<br/> AACGAGCGCGAGCTGCTGAACAGCATGGGCATTTCTCAGCCTACCGT<br/> GGTGTTCGTGTCTAAGAAGGGCCTGCAGAAGATCCTGAACGTGCAGA<br/> AGAAGCTGCCTATCATCCAGAAGATCATCATCATGGACTCTAAGACCG<br/> ACTACCAGGGCTTCCAGAGCATGTACACATTTCGTGACATCTCATCTGC<br/> CTCCTGGCTTCAACGAGTACGACTTCGTGCCAGAGTCTTTTCGACAGG<br/> GACAAAACCATTGCCCTGATCATGAACAGCTCTGGGTCTACCGGCCT<br/> GCCTAAGGGCGTGGCCCTGCCTCATCGCACCGCCTGTGTGCGCTTCT<br/> CTCACGCCCCGCGACCCTATTTTCGGCAACCAGATCATCCCCGACACC<br/> GCTATTCTGAGCGTGGTGCCATTCCACCACGGCTTCGGCATGTTTAC<br/> CACCTGGGCTACCTGATTTGCGGCTTTCGGGTGGTGCTGATGTACC<br/> GCTTCGAGGAGGAGCTGTTCTGCGCAGCCTGCAAGACTACAAAATT<br/> CAGTCTGCCCTGCTGGTGCCAACCCTGTTTCAGCTTCTTCGCTAAGAG<br/> CACCTGATCGACAAGTACGACCTGTCTAACCTGCACGAGATTGCCT<br/> CTGGCGGCGCCCCACTGTCTAAGGAGGTGGGCGAAGCCGTGGCCAA<br/> GCGCTTTCATCTGCCAGGCATCCGCCAGGGCTACGGCCTGACCGAG<br/> ACAACCAGCGCCATTCTGATTACCCCAGAGGGCGACGACAAGCCTGG<br/> CGCCGTGGGCAAGGTGGTGCCATTCTTCGAGGCCAAGGTGGTGGAC<br/> CTGGACACCGGCAAGACCCTGGGAGTGAACCAGCGCGGCGAGCTGT<br/> GTGTGCGCGGCCCTATGATTATGTCCGGCTACGTGAATAACCCTGAG<br/> GCCACAAACGCCCTGATCGACAAGGACGGCTGGCTGCACTCTGGCG<br/> ACATTGCCTACTGGGACGAGGACGAGCACTTCTTCATCGTGGACCGC<br/> CTGAAGTCTCTGATCAAGTACAAGGGCTACCAGGTGGCCCCAGCCGA<br/> GCTGGAGTCTATCCTGCTGCAGCACCTAACATTTTCGACGCCGGAG </p> |
|--|--------------------------------------------------------------------------------------------------------------------------------------------------------------------------------------------------------------------------------------------------------------------------------------------------------------------------------------------------------------------------------------------------------------------------------------------------------------------------------------------------------------------------------------------------------------------------------------------------------------------------------------------------------------------------------------------------------------------------------------------------------------------------------------------------------------------------------------------------------------------------------------------------------------------------------------------------------------------------------------------------------------------------------------------------------------------------------------------------------------------------------------------------------------------------------------------------------------------------------------------------------------------------------------------------------------------------------------------------------------------------------|

|      |                                                                                                                                                                                                                                                                                                                                                                                                                                                                                                                                                                                                                                                                                                                                                                                                                                                                                                                                           |
|------|-------------------------------------------------------------------------------------------------------------------------------------------------------------------------------------------------------------------------------------------------------------------------------------------------------------------------------------------------------------------------------------------------------------------------------------------------------------------------------------------------------------------------------------------------------------------------------------------------------------------------------------------------------------------------------------------------------------------------------------------------------------------------------------------------------------------------------------------------------------------------------------------------------------------------------------------|
|      | <p>TGGCCGGCCTGCCCCGACGACGATGCCGGCGAGCTGCCTGCCGCCGT<br/> CGTCGTGCTGGAACACGGCAAGACCATGACCGAGAAGGAGATCGTG<br/> GACTATGTGGCCAGCCAGGTGACAACCGCCAAGAAGCTGCGCGGCG<br/> GAGTGGTGTTCGTGGACGAGGTGCCCAAGGGCCTGACCGGCAAGCT<br/> GGACGCCCCGCAAGATCCGCGAGATCCTGATCAAGGCTAAGAAAGGC<br/> GGCAAGATCGCCGTGTAA</p>                                                                                                                                                                                                                                                                                                                                                                                                                                                                                                                                                                                                                                           |
| nGFP | <p>ATGGTGAGCAAGGGCGAGGAGCTGTTACCGGGGTGGTGCCCATCC<br/> TGGTCGAGCTGGACGGCGACGTAAACGGCCACAAGTTCAGCGTGTC<br/> CGGCGAGGGCGAGGGCGATGCCACCTACGGCAAGCTGACCCTGAAG<br/> TTCATCTGCACCACCGGCAAGCTGCCCCGTGCCCTGGCCCACCCTCGT<br/> GACCACCCTGACCTACGGCGTGCAAGTCTTCAGCCGCTACCCCGAC<br/> CACATGAAGCAGCACGACTTCTTCAAGTCCGCCATGCCCCGAAGGCTA<br/> CGTCCAGGAGCGCACCATCTTCTTCAAGGACGACGGCAACTACAAGA<br/> CCCGCGCCGAGGTGAAGTTCGAGGGCGACACCCTGGTGAACCGCAT<br/> CGAGCTGAAGGGCATCGACTTCAAGGAGGACGGCAACATCCTGGGG<br/> CACAAGCTGGAGTACAACAGCCACAACGTCTATATCATGGCC<br/> GACAAGCAGAAGAACGGCATCAAGGTGAACTTCAAGATCCGCCACAA<br/> CATCGAGGACGGCAGCGTGCAGCTCGCCGACCACTACCAGCAGAAC<br/> ACCCCATCGGCGACGGCCCCGTGCTGCTGCCCCGACAACCACTACC<br/> TGAGCACCCAGTCCGCCCTGAGCAAAGACCCCAACGAGAAGCGCGA<br/> TCACATGGTCCTGCTGGAGTTCGTGACCGCCGCCGGGATCACTCTCG<br/> GCATGGACGAGCTGTACAAGGGAGATCCAAAAAAGAAGAGAAAGGTA<br/> GGCGATCCAAAAAAGAAGAGAAAGGTAGGTGATCCAAAAAAGAAGAG<br/> AAAGGTATAA</p> |

**Table 2.** Antibodies used in this study.

| <b>Antigen</b>                   | <b>Dilution<br/>immunostaining (WB)<br/>[FACS]</b> | <b>Manufacturer</b>      | <b>Catalog #</b> |
|----------------------------------|----------------------------------------------------|--------------------------|------------------|
| $\alpha$ -Actinin                | 1:100                                              | Abcam                    | ab9465           |
| GFP                              | 1:1000                                             | Abcam                    | ab13970          |
| Troponin I                       | 1:100                                              | Santa Cruz Biotechnology | SC-15368         |
| CD31                             | 1:100                                              | R&D Biosystems           | AF3628           |
| WGA                              | 1:50                                               | Life Technologies        | W11261           |
| Caspase 3                        | (1:50)                                             | Santa Cruz Biotechnology | sc-7148          |
| Caspase 3 p17                    | (1:50)                                             | Santa Cruz Biotechnology | sc-271028        |
| AC                               | 1:25 (1:100)                                       | Sigma                    | HPA005468        |
| AC alpha subunit                 | (1:100)                                            | Santa Cruz Biotechnology | sc-136275        |
| S1pr2                            | 1:50 (1:100)                                       | Novus Biologicals        | NBP2-26691SS     |
| Sphk1                            | 1:50 (1:100)                                       | Santa Cruz Biotechnology | sc-48825         |
| Sphk2                            | 1:100 (1:100)                                      | Bioss Antibodies         | bs-2653R         |
| B220/CD45R PerCP-Cy5.5           | [1:300]                                            | BioLegend                | Clone RA3-6B2    |
| CD19 PerCP-Cy5.5                 | [1:300]                                            | BioLegend                | Clone 6D5        |
| CD3 PerCP-Cy5.5                  | [1:300]                                            | BioLegend                | Clone 17A2       |
| CD90.2 (Thy-1.2) PerCP-Cy5.5     | [1:300]                                            | BioLegend                | Clone 53-2.1     |
| CD49b (pan-NK cells) PerCP-Cy5.5 | [1:300]                                            | BioLegend                | Clone DX5        |

|                                        |         |           |                      |
|----------------------------------------|---------|-----------|----------------------|
| CD103 PerCP-Cy5.5                      | [1:300] | BioLegend | Clone 2E7            |
| NK-1.1 PerCP-Cy5.5                     | [1:300] | BioLegend | Clone PK136          |
| TER-119/Erythroid Cells<br>PerCP-Cy5.5 | [1:300] | BioLegend | Clone TER-119        |
| CD11b APC                              | [1:300] | BioLegend | Clone M1/70          |
| CD45 Alexa Fluor 700                   | [1:300] | BioLegend | Clone 30-F11         |
| F4/80 PE-Cy7                           | [1:300] | BioLegend | Clone BM8            |
| Ly-6C BV510                            | [1:300] | BioLegend | Clone HK1.4          |
| Ly-6G FITC                             | [1:300] | BioLegend | Clone 1A8            |
| MHCII PE                               | [1:300] | BioLegend | Clone<br>M5/114.15.2 |

**Table 3.** List of genes involved in sphingolipid metabolism and signaling and their RNA levels and fold-changes in expression 4 and 24 h post MI, relative to the sham-operated control (129 genes added as a separate Excel file).

**Table 4.** Genes with significantly different expression in hearts treated with AC modRNA vs. Luc control modRNA 4 h post MI (30 genes added as a separate Excel file).

**Table 5.** Genes with significantly different expression in hearts treated with AC

modRNA vs. Luc control modRNA 24 h post MI (299 genes added as a separate Excel file).

**Table 6.** Genes with significantly different expression levels in hearts treated with AC

modRNA vs. Luc control modRNA (1675 genes added as a separate Excel file).

**Table 7.** GO enrichment analysis 24 hours post MI for hearts treated with AC modRNA.

| Gene set   | Description                                            | Enrichment score | <i>P</i> -value |
|------------|--------------------------------------------------------|------------------|-----------------|
| GO:0048002 | Antigen processing and presentation of peptide antigen | 21.1029          | 6.84E-10        |
| GO:0003823 | Antigen binding                                        | 21.1029          | 6.84E-10        |
| GO:0005833 | Hemoglobin complex                                     | 20.8875          | 8.49E-10        |
| GO:0042611 | MHC protein complex                                    | 20.8243          | 9.04E-10        |
| GO:0042605 | Peptide antigen binding                                | 19.9564          | 2.15E-09        |
| GO:0046977 | TAP binding                                            | 19.208           | 4.55E-09        |
| GO:0006955 | Immune response                                        | 19.1991          | 4.59E-09        |
| GO:0019882 | Antigen processing and presentation                    | 19.1353          | 4.89E-09        |
| GO:0002376 | Immune system process                                  | 17.936           | 1.62E-08        |
| GO:0031720 | Haptoglobin binding                                    | 16.8413          | 4.85E-08        |

|            |                                                                        |         |          |
|------------|------------------------------------------------------------------------|---------|----------|
| GO:0051607 | Defense response to virus                                              | 16.4842 | 6.93E-08 |
| GO:0002474 | Antigen processing and presentation of peptide antigen via MHC class I | 15.7855 | 1.39E-07 |
| GO:0031838 | Haptoglobin-hemoglobin complex                                         | 15.2437 | 2.40E-07 |
| GO:0002478 | Antigen processing and presentation of exogenous peptide antigen       | 14.5679 | 4.71E-07 |
| GO:0009615 | Response to virus                                                      | 13.1906 | 1.87E-06 |
| GO:0019884 | Antigen processing and presentation of exogenous antigen               | 13.1855 | 1.88E-06 |
| GO:0042608 | T cell receptor binding                                                | 12.8124 | 2.73E-06 |
| GO:0045087 | Innate immune response                                                 | 12.506  | 3.70E-06 |
| GO:1903901 | Negative regulation of viral life cycle                                | 12.129  | 5.40E-06 |
| GO:0019825 | Oxygen binding                                                         | 11.8701 | 7.00E-06 |
| GO:0002252 | Immune effector process                                                | 11.8569 | 7.09E-06 |
| GO:0002483 | Antigen processing and presentation of endogenous peptide antigen      | 11.5652 | 9.49E-06 |
| GO:0006952 | Defense response                                                       | 11.3703 | 1.15E-05 |
| GO:1903900 | Regulation of viral life cycle                                         | 10.9715 | 1.72E-05 |
| GO:0042612 | MHC class I protein complex                                            | 10.7314 | 2.18E-05 |

|            |                                                                                   |         |          |
|------------|-----------------------------------------------------------------------------------|---------|----------|
| GO:0019883 | Antigen processing and presentation of endogenous antigen                         | 10.7314 | 2.18E-05 |
| GO:0030881 | Beta-2-microglobulin binding                                                      | 10.7314 | 2.18E-05 |
| GO:0048525 | Negative regulation of viral process                                              | 10.4834 | 2.80E-05 |
| GO:0048584 | Positive regulation of response to stimulus                                       | 10.4587 | 2.87E-05 |
| GO:0098542 | Defense response to other organism                                                | 9.99147 | 4.58E-05 |
| GO:0045088 | Regulation of innate immune response                                              | 9.74742 | 5.84E-05 |
| GO:0043900 | Regulation of multi-organism process                                              | 9.74311 | 5.87E-05 |
| GO:2000781 | Positive regulation of double-strand break repair                                 | 9.47654 | 7.66E-05 |
| GO:0044424 | Intracellular part                                                                | 9.41432 | 8.15E-05 |
| GO:0044464 | Cell part                                                                         | 9.30412 | 9.10E-05 |
| GO:0005737 | Cytoplasm                                                                         | 9.2458  | 9.65E-05 |
| GO:0045089 | Positive regulation of innate immune response                                     | 9.12315 | 0.000109 |
| GO:0019885 | Antigen processing and presentation of endogenous peptide antigen via MHC class I | 9.11551 | 0.00011  |
| GO:0009897 | External side of plasma membrane                                                  | 9.09004 | 0.000113 |
| GO:0034341 | Response to interferon-gamma                                                      | 8.8805  | 0.000139 |
| GO:0050792 | Regulation of viral process                                                       | 8.75679 | 0.000157 |

|            |                                                        |         |          |
|------------|--------------------------------------------------------|---------|----------|
| GO:0050776 | Regulation of immune response                          | 8.65487 | 0.000174 |
| GO:0043901 | Negative regulation of multi-organism process          | 8.60599 | 0.000183 |
| GO:0070971 | Endoplasmic reticulum exit site                        | 8.54454 | 0.000195 |
| GO:0050778 | Positive regulation of immune response                 | 8.42098 | 0.00022  |
| GO:0031722 | Hemoglobin beta binding                                | 8.41449 | 0.000222 |
| GO:0042613 | MHC class II protein complex                           | 8.26225 | 0.000258 |
| GO:0032182 | Ubiquitin-like protein binding                         | 8.2535  | 0.00026  |
| GO:0051707 | Response to other organism                             | 8.24584 | 0.000262 |
| GO:0045071 | Negative regulation of viral genome replication        | 8.21216 | 0.000271 |
| GO:0005797 | Golgi medial cisterna                                  | 8.15608 | 0.000287 |
| GO:0006950 | Response to stress                                     | 8.04285 | 0.000321 |
| GO:1903038 | Negative regulation of leukocyte cell-cell<br>adhesion | 8.00845 | 0.000333 |
| GO:0048821 | Erythrocyte development                                | 7.97677 | 0.000343 |
| GO:0007088 | Regulation of mitotic nuclear division                 | 7.75156 | 0.00043  |
| GO:0042287 | MHC protein binding                                    | 7.48826 | 0.00056  |
| GO:0043207 | Response to external biotic stimulus                   | 7.47071 | 0.00057  |
| GO:0098797 | Plasma membrane protein complex                        | 7.43179 | 0.000592 |

|            |                                                                                                                 |         |          |
|------------|-----------------------------------------------------------------------------------------------------------------|---------|----------|
| GO:0002682 | Regulation of immune system process                                                                             | 7.41261 | 0.000604 |
| GO:0002579 | Positive regulation of antigen processing and presentation                                                      | 7.3327  | 0.000654 |
| GO:0042824 | MHC class I peptide loading complex                                                                             | 7.3258  | 0.000658 |
| GO:0046978 | TAP1 binding                                                                                                    | 7.3258  | 0.000658 |
| GO:0046979 | TAP2 binding                                                                                                    | 7.3258  | 0.000658 |
| GO:0002282 | Microglial cell activation involved in immune response                                                          | 7.3258  | 0.000658 |
| GO:0002477 | Antigen processing and presentation of exogenous peptide antigen via MHC class Ib                               | 7.3258  | 0.000658 |
| GO:0002481 | Antigen processing and presentation of exogenous protein antigen via MHC class Ib, TAP-dependent                | 7.3258  | 0.000658 |
| GO:0002484 | Antigen processing and presentation of endogenous peptide antigen via MHC class I via ER pathway                | 7.3258  | 0.000658 |
| GO:0002485 | Antigen processing and presentation of endogenous peptide antigen via MHC class I via ER pathway, TAP-dependent | 7.3258  | 0.000658 |
| GO:0002697 | Regulation of immune effector process                                                                           | 7.31249 | 0.000667 |

|            |                                                                                   |         |          |
|------------|-----------------------------------------------------------------------------------|---------|----------|
| GO:0032481 | Positive regulation of type I interferon production                               | 7.23164 | 0.000723 |
| GO:0002230 | Positive regulation of host defense response to virus                             | 7.19722 | 0.000749 |
| GO:0003725 | Double-stranded RNA binding                                                       | 7.1669  | 0.000772 |
| GO:0043903 | Regulation of symbiosis, encompassing mutualism through parasitism                | 7.15468 | 0.000781 |
| GO:0002764 | Immune response-regulating signaling pathway                                      | 7.15151 | 0.000784 |
| GO:0051784 | Negative regulation of nuclear division                                           | 7.13614 | 0.000796 |
| GO:0061515 | Myeloid cell development                                                          | 7.13614 | 0.000796 |
| GO:0098552 | Side of membrane                                                                  | 7.11603 | 0.000812 |
| GO:0045069 | Regulation of viral genome replication                                            | 7.09476 | 0.000829 |
| GO:2000779 | Regulation of double-strand break repair                                          | 7.0429  | 0.000874 |
| GO:0048583 | Regulation of response to stimulus                                                | 6.98493 | 0.000926 |
| GO:0009607 | Response to biotic stimulus                                                       | 6.9418  | 0.000967 |
| GO:0019886 | Antigen processing and presentation of exogenous peptide antigen via MHC class II | 6.8513  | 0.001058 |
| GO:0005815 | Microtubule organizing center                                                     | 6.81559 | 0.001097 |
| GO:0032728 | Positive regulation of interferon-beta production                                 | 6.80268 | 0.001111 |

|            |                                                                                    |         |          |
|------------|------------------------------------------------------------------------------------|---------|----------|
| GO:0051250 | Negative regulation of lymphocyte activation                                       | 6.8017  | 0.001112 |
| GO:0050868 | Negative regulation of T cell activation                                           | 6.79369 | 0.001121 |
| GO:0042825 | TAP complex                                                                        | 6.64257 | 0.001304 |
| GO:0045356 | Positive regulation of interferon-alpha biosynthetic process                       | 6.64257 | 0.001304 |
| GO:0002476 | Antigen processing and presentation of endogenous peptide antigen via MHC class Ib | 6.64257 | 0.001304 |
| GO:0031721 | Hemoglobin $\alpha$ binding                                                        | 6.64257 | 0.001304 |
| GO:0009407 | Toxin catabolic process                                                            | 6.64257 | 0.001304 |
| GO:0090487 | Secondary metabolite catabolic process                                             | 6.64257 | 0.001304 |
| GO:0140104 | Molecular carrier activity                                                         | 6.63921 | 0.001308 |
| GO:0032183 | SUMO binding                                                                       | 6.63921 | 0.001308 |
| GO:0071346 | Cellular response to interferon-gamma                                              | 6.60763 | 0.00135  |
| GO:0043065 | Positive regulation of apoptotic process                                           | 6.53846 | 0.001447 |
| GO:0051783 | Regulation of nuclear division                                                     | 6.53322 | 0.001454 |
| GO:0032735 | Positive regulation of interleukin-12 production                                   | 6.44985 | 0.001581 |
| GO:1902187 | Negative regulation of viral release from host cell                                | 6.44262 | 0.001592 |

|            |                                                                                           |         |          |
|------------|-------------------------------------------------------------------------------------------|---------|----------|
| GO:0002504 | Antigen processing and presentation of peptide or polysaccharide antigen via MHC class II | 6.44262 | 0.001592 |
| GO:0002495 | Antigen processing and presentation of peptide antigen via MHC class II                   | 6.44262 | 0.001592 |
| GO:0009967 | Positive regulation of signal transduction                                                | 6.43139 | 0.00161  |
| GO:0043068 | Positive regulation of programmed cell death                                              | 6.42308 | 0.001624 |
| GO:0031349 | Positive regulation of defense response                                                   | 6.3557  | 0.001737 |
| GO:0002683 | Negative regulation of immune system process                                              | 6.25759 | 0.001916 |
| GO:0002684 | Positive regulation of immune system process                                              | 6.25123 | 0.001928 |
| GO:0045354 | Regulation of interferon-alpha biosynthetic process                                       | 6.14165 | 0.002151 |
| GO:2001034 | Positive regulation of double-strand break repair via nonhomologous end joining           | 6.14165 | 0.002151 |
| GO:0002428 | Antigen processing and presentation of peptide antigen via MHC class Ib                   | 6.14165 | 0.002151 |
| GO:0030578 | PML body organization                                                                     | 6.14165 | 0.002151 |
| GO:0032020 | ISG15-protein conjugation                                                                 | 6.14165 | 0.002151 |
| GO:1990111 | Spermatoproteasome complex                                                                | 6.14165 | 0.002151 |
| GO:0005488 | Binding                                                                                   | 6.08803 | 0.00227  |

|            |                                                         |         |          |
|------------|---------------------------------------------------------|---------|----------|
| GO:0031347 | Regulation of defense response                          | 6.05617 | 0.002343 |
| GO:0045839 | Negative regulation of mitotic nuclear division         | 6.03176 | 0.002401 |
| GO:0030554 | Adenyl nucleotide binding                               | 6.00878 | 0.002457 |
| GO:0005524 | ATP binding                                             | 5.95293 | 0.002598 |
| GO:0002577 | Regulation of antigen processing and presentation       | 5.92738 | 0.002665 |
| GO:0003950 | NAD+ ADP-ribosyltransferase activity                    | 5.92738 | 0.002665 |
| GO:0009986 | Cell surface                                            | 5.85756 | 0.002858 |
| GO:0002695 | Negative regulation of leukocyte activation             | 5.83136 | 0.002934 |
| GO:0016740 | Transferase activity                                    | 5.80548 | 0.003011 |
| GO:0051704 | Multi-organism process                                  | 5.77316 | 0.00311  |
| GO:0050691 | Regulation of host defense response to virus            | 5.75049 | 0.003181 |
| GO:0004601 | Peroxidase activity                                     | 5.75049 | 0.003181 |
| GO:0051534 | Negative regulation of NFAT protein import into nucleus | 5.74608 | 0.003195 |
| GO:0002730 | Regulation of dendritic cell cytokine production        | 5.74608 | 0.003195 |
| GO:0005828 | Kinetochore microtubule                                 | 5.74608 | 0.003195 |
| GO:0044389 | Ubiquitin-like protein ligase binding                   | 5.69979 | 0.003347 |

|            |                                                         |         |          |
|------------|---------------------------------------------------------|---------|----------|
| GO:0048522 | Positive regulation of cellular process                 | 5.68587 | 0.003394 |
| GO:0022408 | Negative regulation of cell-cell adhesion               | 5.68149 | 0.003408 |
| GO:0005886 | Plasma membrane                                         | 5.66448 | 0.003467 |
| GO:0033218 | Amide binding                                           | 5.6501  | 0.003517 |
| GO:0001774 | Microglial cell activation                              | 5.63272 | 0.003579 |
| GO:0001916 | Positive regulation of T cell-mediated cytotoxicity     | 5.63272 | 0.003579 |
| GO:0035455 | Response to interferon-alpha                            | 5.63272 | 0.003579 |
| GO:0005813 | Centrosome                                              | 5.57439 | 0.003794 |
| GO:0032559 | Adenyl ribonucleotide binding                           | 5.51499 | 0.004026 |
| GO:0048518 | Positive regulation of biological process               | 5.50622 | 0.004061 |
| GO:0032727 | Positive regulation of interferon-alpha production      | 5.49711 | 0.004099 |
| GO:0016684 | Oxidoreductase activity, acting on peroxide as acceptor | 5.49235 | 0.004118 |
| GO:0051310 | Metaphase plate congression                             | 5.49235 | 0.004118 |
| GO:0048519 | Negative regulation of biological process               | 5.489   | 0.004132 |
| GO:0042277 | Peptide binding                                         | 5.48282 | 0.004158 |
| GO:0010942 | Positive regulation of cell death                       | 5.46894 | 0.004216 |
| GO:0002821 | Positive regulation of adaptive immune response         | 5.45732 | 0.004265 |

|            |                                                             |         |          |
|------------|-------------------------------------------------------------|---------|----------|
| GO:0002250 | Adaptive immune response                                    | 5.45532 | 0.004274 |
| GO:0005515 | Protein binding                                             | 5.4539  | 0.00428  |
| GO:0050688 | Regulation of defense response to virus                     | 5.42095 | 0.004423 |
| GO:0042289 | MHC class II protein binding                                | 5.41949 | 0.004429 |
| GO:0042609 | CD4 receptor binding                                        | 5.41949 | 0.004429 |
| GO:0045359 | Positive regulation of interferon-beta biosynthetic process | 5.41949 | 0.004429 |
| GO:0080009 | mRNA methylation                                            | 5.41949 | 0.004429 |
| GO:0030492 | Hemoglobin binding                                          | 5.41949 | 0.004429 |
| GO:0070098 | Chemokine-mediated signaling pathway                        | 5.41088 | 0.004468 |
| GO:0031985 | Golgi cisterna                                              | 5.41088 | 0.004468 |
| GO:0002831 | Regulation of response to biotic stimulus                   | 5.39583 | 0.004535 |
| GO:2001020 | Regulation of response to DNA damage stimulus               | 5.36171 | 0.004693 |

**Table 8.** Primer sequences for qPCR.

| Gene     | Forward                 | Reverse                |
|----------|-------------------------|------------------------|
| AC       | ACAGGATTCAAACCAGGACTGT  | TGGGCATCTTTCCTTCCGAA   |
| Arg1     | AAGACAGCAGAGGAGGTGAAGAG | TGGGAGGAGAAGGCGTTTGC   |
| Ngp      | GCCTAAAGACTGCGACTTCCT   | TGGGTATCCTCTCGACTGCAA  |
| Sphk1    | ATACTCACCGAACGGAAGAACC  | CCATTAGCCCATTACACACCTC |
| Sphk2    | CAGAACGACAGAACCATGCC    | CCCATTGAGCACCTCGTAAAG  |
| S1PR2    | CACAGCCAACAGTCTCCAAA    | TCTGAGTATAAGCCGCCCA    |
| 18s rRNA | TAACGAACGAGACTCTGGCAT   | CGGACATCTAAGGGCATCACAG |

3. Supplementary figures

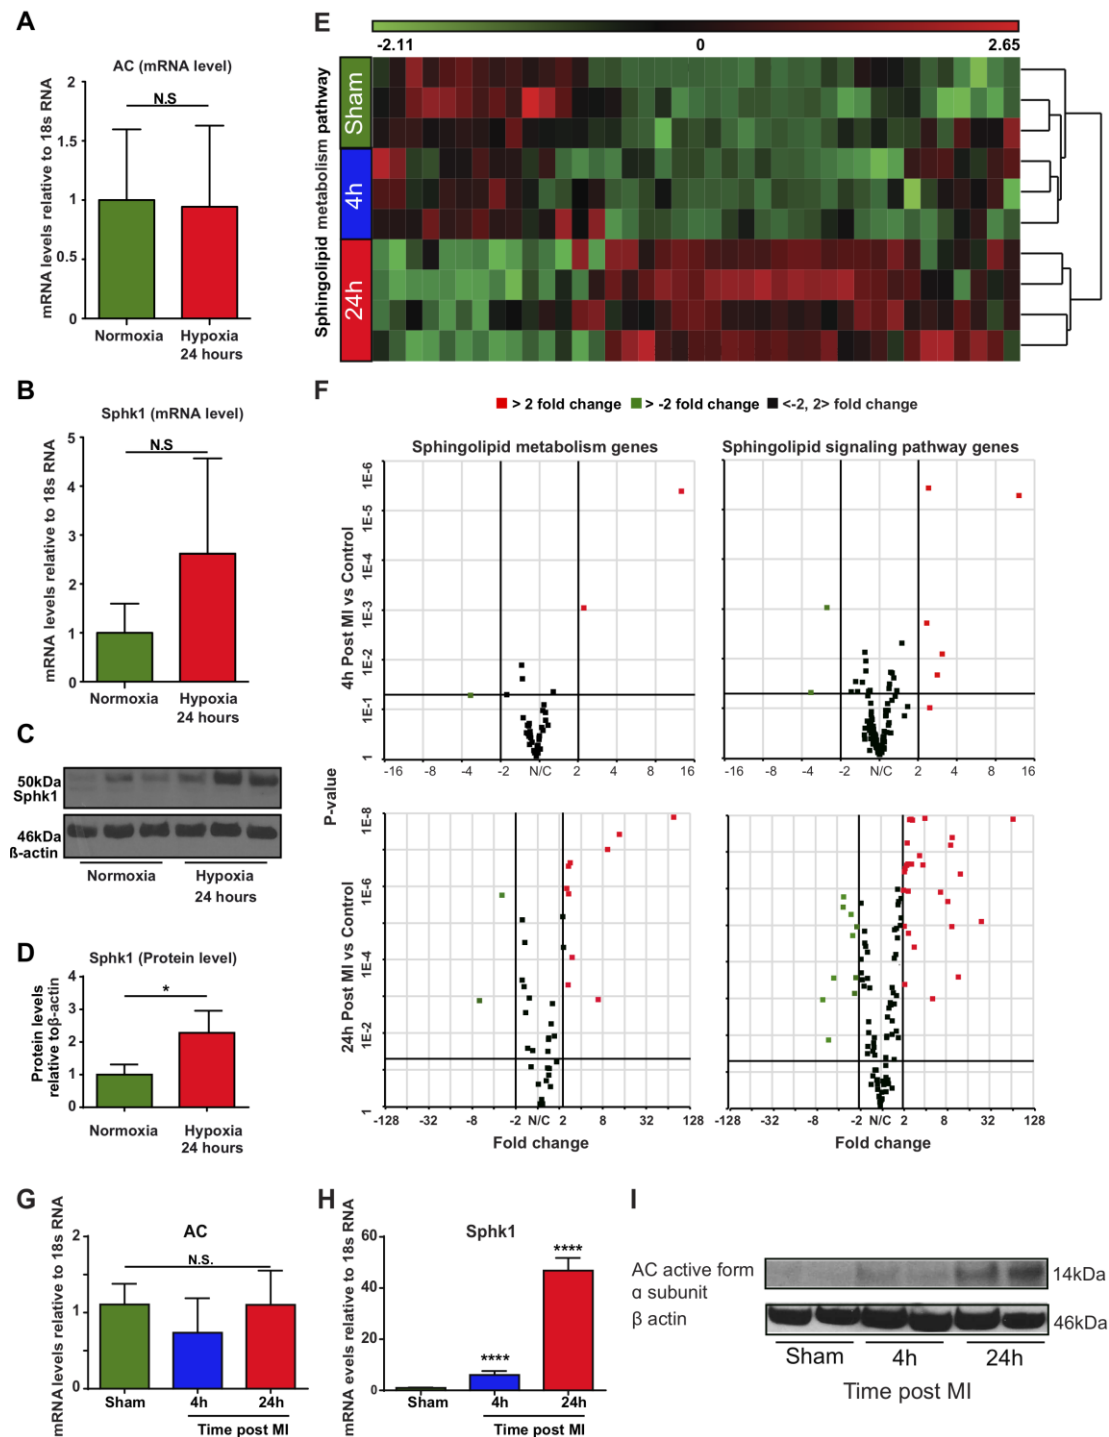

Supplementary Figure S1. Sphingolipid metabolism dynamics in cardiac cells in hypoxic condition *in vitro* and after MI.

Primary cardiomyocytes were isolated from the hearts of two- to three-day-old rats. To evaluate mRNA and protein levels for endogenous AC (mRNA) and Sphk1 (mRNA and protein), we incubated the cells under normoxia (21% oxygen) or hypoxia (<2% oxygen). We isolated mRNA and protein after 24 hours. We determined mRNA levels by RT-qPCR for AC, n=4 (**A**), and Sphk1, n=3 (**B**), and protein levels for Sphk1, n=3 (**C-D**), 24 hours after transfection. **E**, Hierarchical cluster dendrogram for the sphingolipid metabolism transcriptome in sham-operated hearts and in hearts 4 and 24 hours post MI, n=3,3 and 4. **F**, Volcano plot of the sphingolipid metabolism transcriptome and sphingolipid signaling pathway transcriptome at 4 hours and 24 hours post Mi, n=3 and 4. **G-H**, Evaluation of mRNA levels by RT-qPCR for AC, n=4 (**G**), or Sphk1, n=4 (**H**), relative to 18S rRNA in the LV of sham-operated hearts and in hearts 4 and 24 hours post MI. **I**, Western blot of the AC active subunit  $\alpha$  in the LV of sham-operated hearts and hearts harvested 4 or 24 hours post MI. \*\*\*\*,  $P<0.0001$ , \*,  $P<0.05$ , NS, not significant. Two-tailed Student's *t*-tests; (A, B and D), ANOVA test (G-H).

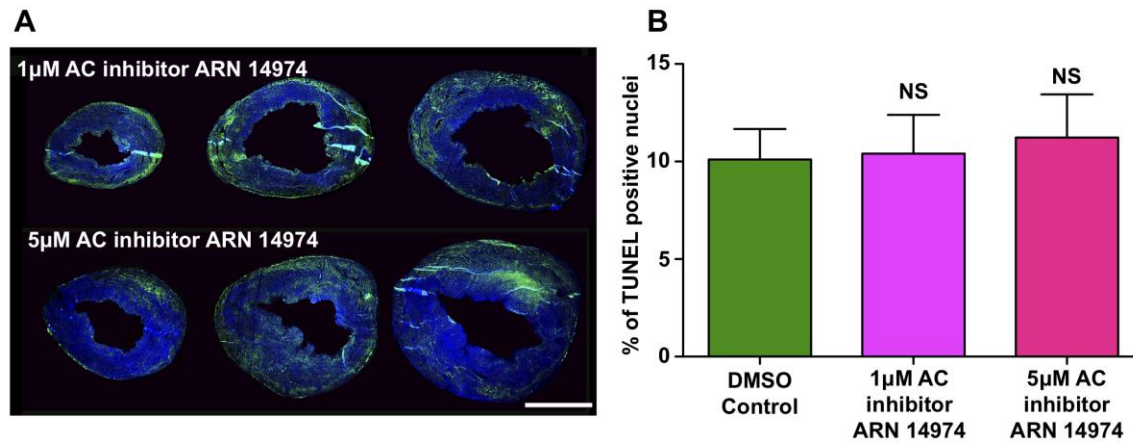

**Supplementary Figure S2. The effect of suboptimal treatment with AC inhibitor on cell death after MI.**

**A**, Representative images of heart sections from mice that received suboptimal treatment of AC inhibitor (1 or 5μM), obtained 24 hours post MI. **B**, Quantified cell death levels in the LV after suboptimal treatment with AC inhibitor (1 or 5μM) or DMSO control, 24 hours post MI, n=3. NS, not significant. One-way ANOVA, Tukey's Multiple Comparison Test (B). Scale bar 1mm.

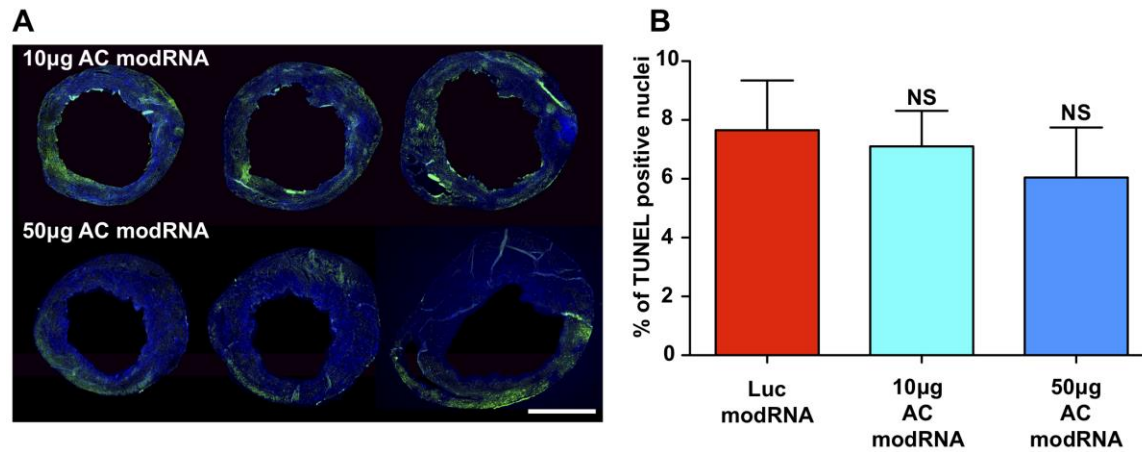

**Supplementary Figure S3. The effect of suboptimal treatment with AC modRNA on cell death after MI.**

**A**, Representative images of heart sections from mice that received suboptimal treatment with AC modRNA (10 or 50µg), obtained 48 hours post MI. **B**, Quantified cell death levels in the LV after suboptimal treatment with AC modRNA (10 or 50µ) or 100µ Luc modRNA (control), 48 hours post MI, n=3. NS, not significant. One-way ANOVA, Tukey's Multiple Comparison Test (B). Scale bar 1mm.

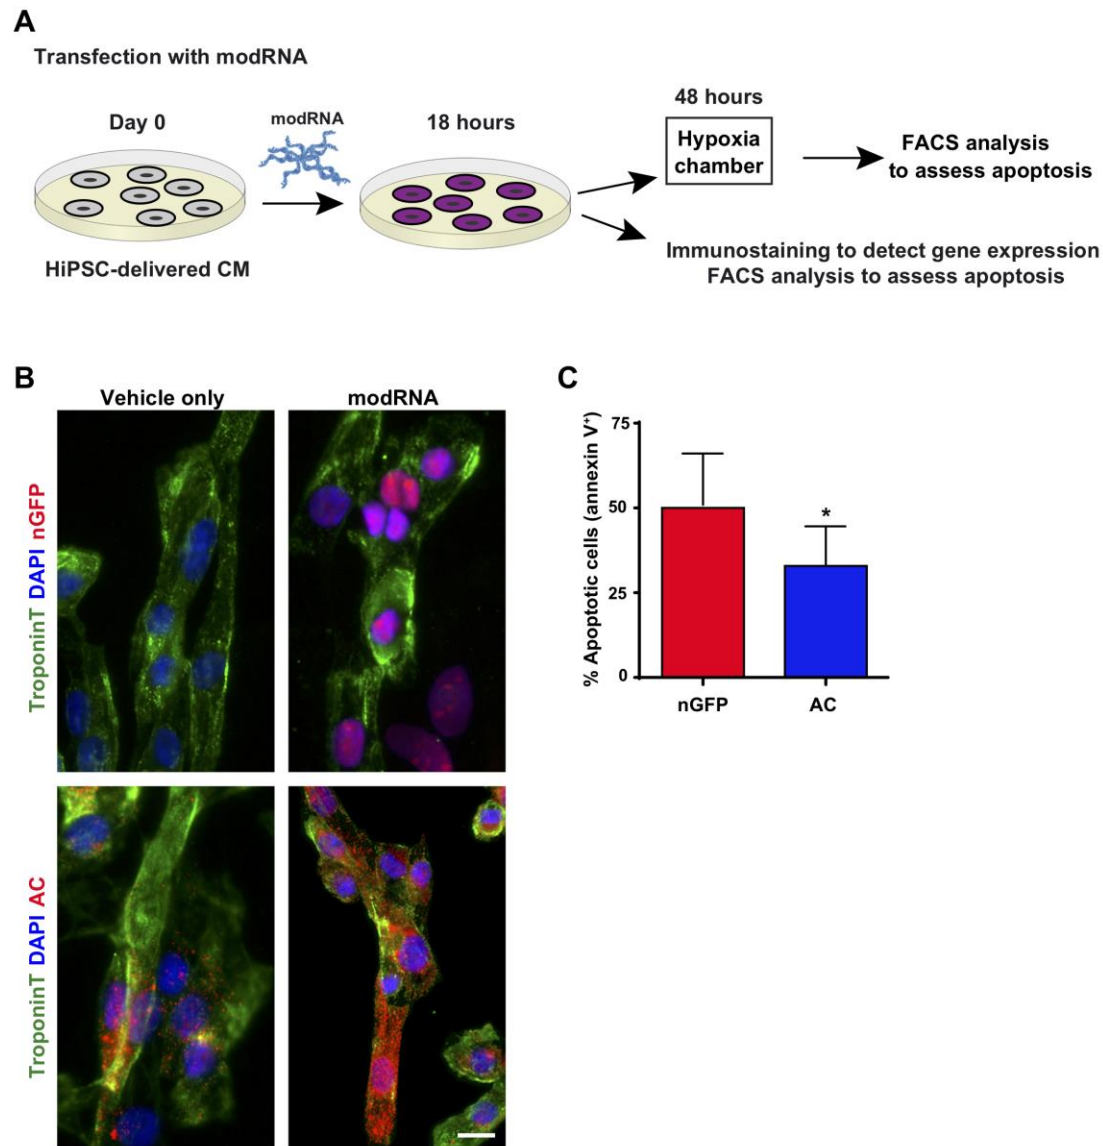

**Supplementary Figure S4. Effect of AC modRNA on cell death in human induced pluripotent stem cell-derived CMs (hiCMs) after 48 hours of hypoxia. A,** hiCMs were transfected with modRNAs for either nGFP or AC to study the effect of AC overexpression on hiCM cell death. **B,** 18 hours post transfection, the cells were fixed and immunostained to confirm modRNA translation. **C,** Analysis of hiCM cell death after 48 hours culture in hypoxia chamber. nGFP modRNA- or AC modRNA-transfected

hiCMs were stained with Annexin V and analyzed using FACS. \*,  $P < 0.05$ ,  $n = 7$ , two-tailed Student's  $t$ -tests. Scale bar  $10\mu\text{m}$ .

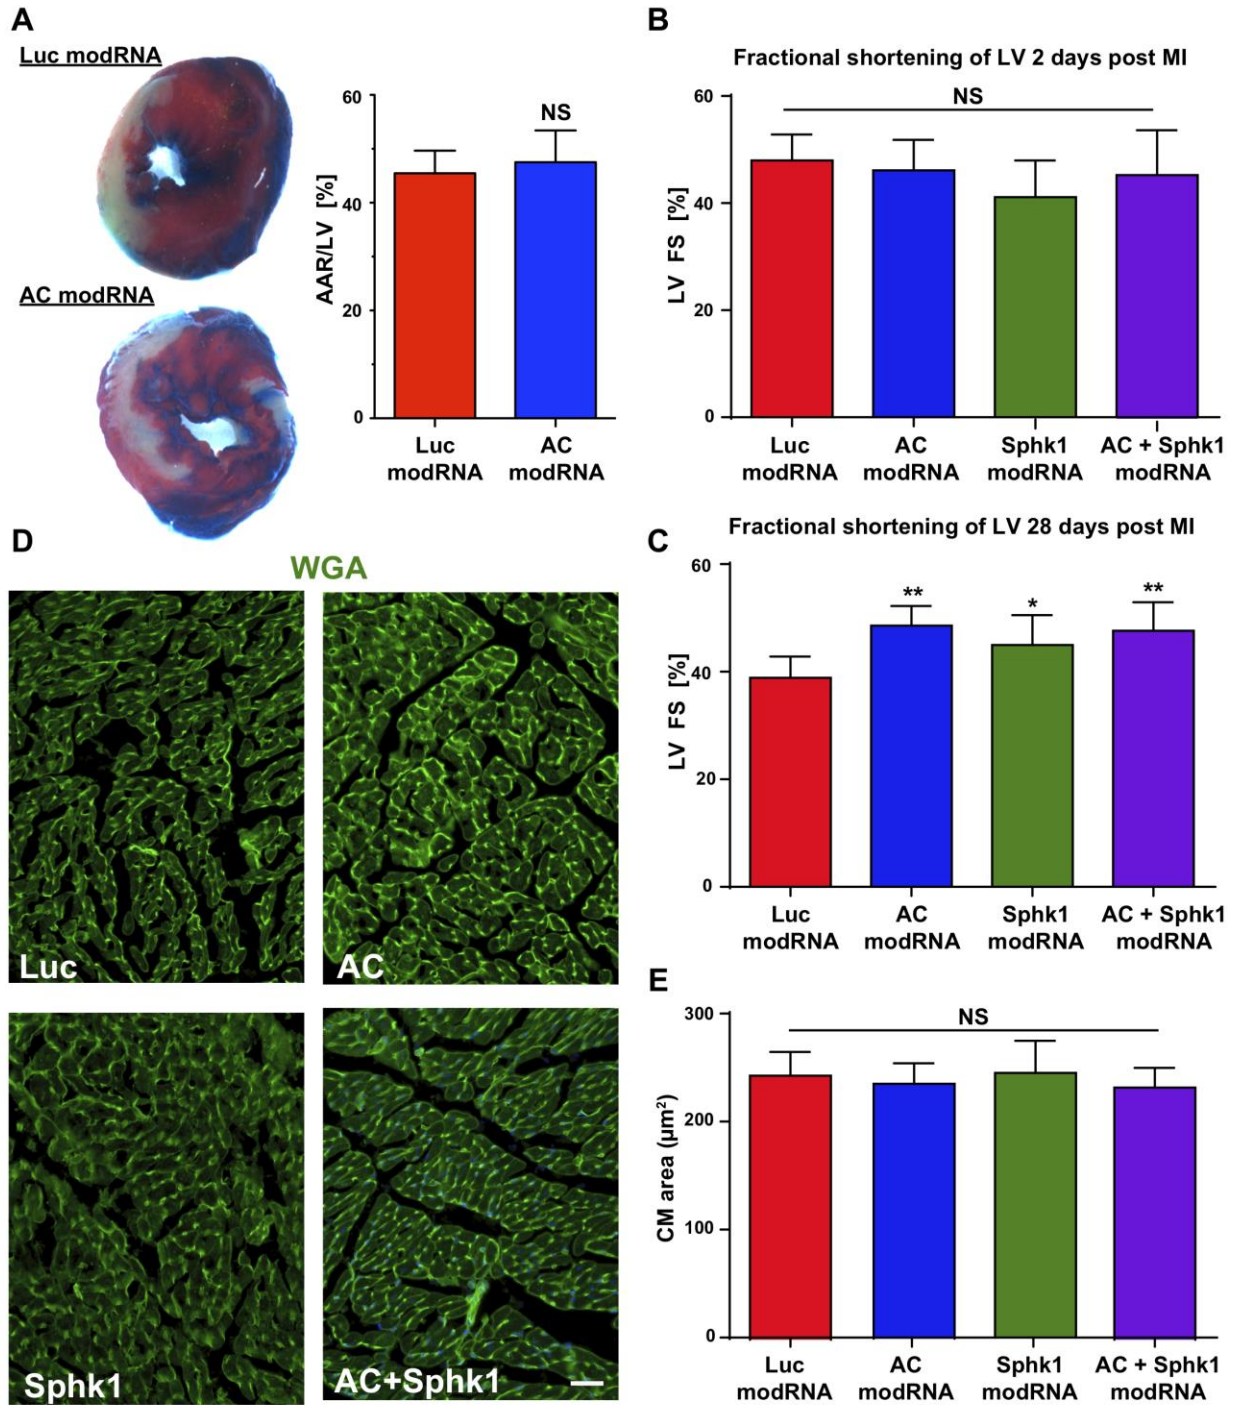

**Supplementary Figure S5. Effect of AC modRNA on heart function and CM size**

**post MI. A,** Representative images and quantification of area at risk from the left ventricle (AAR/LV). The blue-stained areas represent nonischemic tissue, and red stained areas represent the area at risk. Pale areas indicate infarct areas (n=4). **B&C,** Percentage of fractional shortening of LV at 2 and 28 days after MI and modRNA injection. **C-D,** WGA staining was performed 28 days post MI and modRNA injection to assess CM size. \*\*,  $P < 0.01$ , \*,  $P < 0.05$ , NS, not significant; n=6, one-way ANOVA, Bonferroni post-hoc tests. Scale bar 50 $\mu$ m.

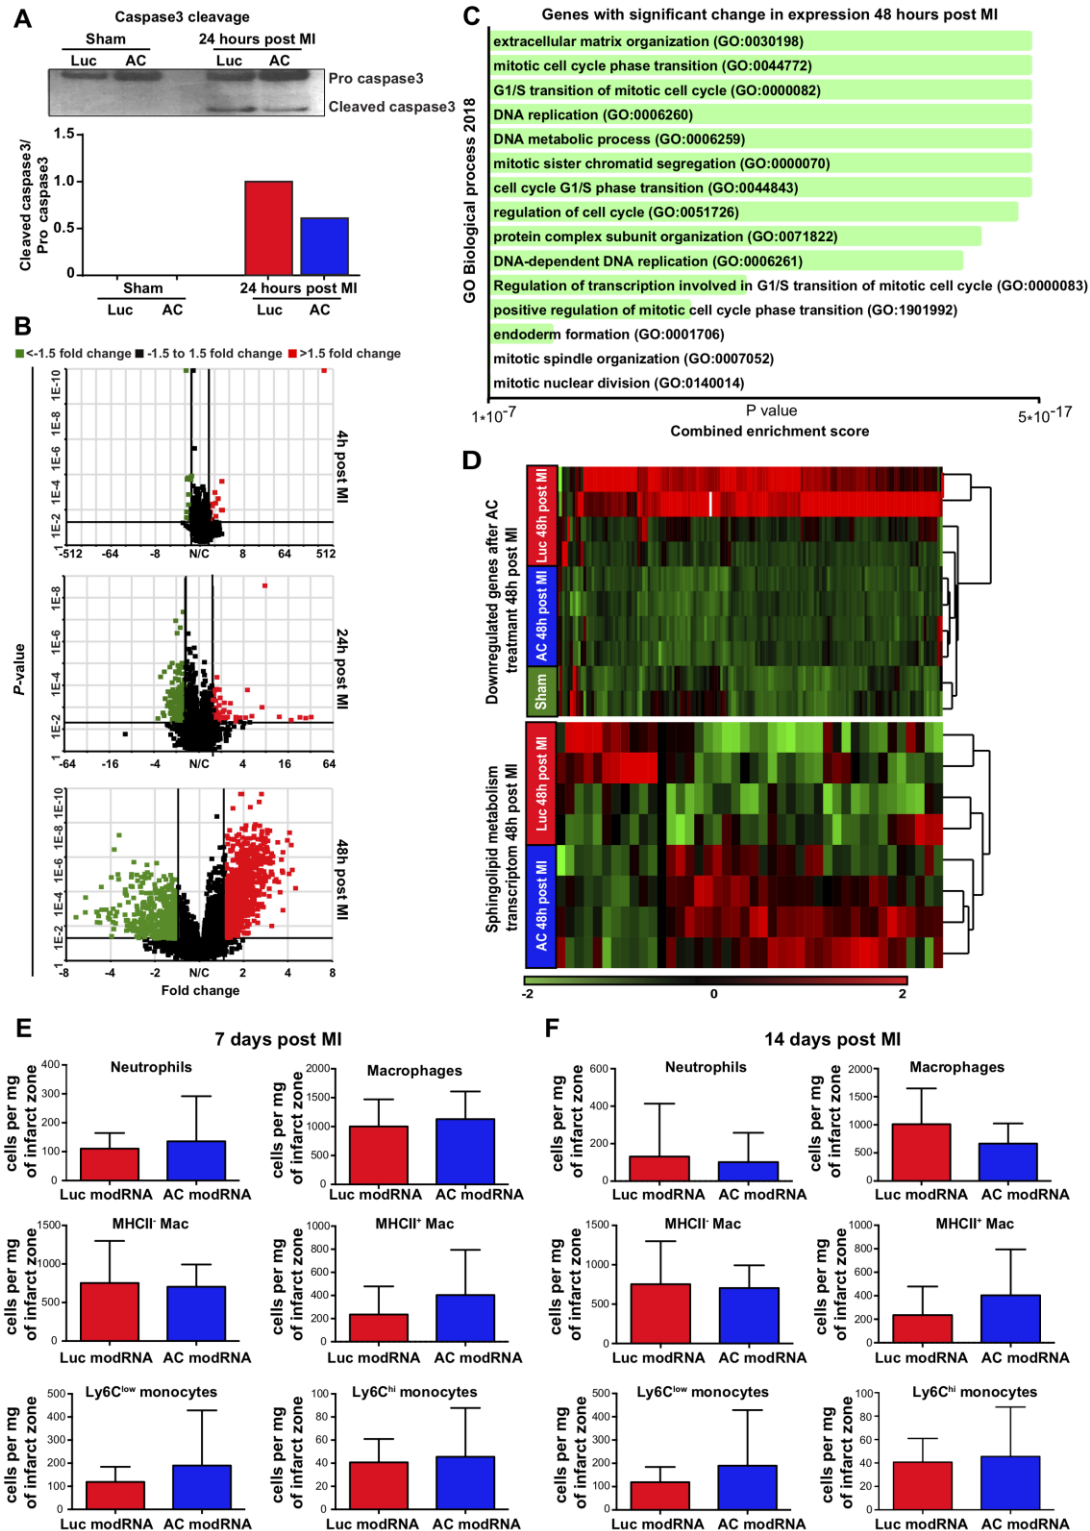

Supplementary Figure S6. Effect of AC overexpression on cell death, global gene expression and composition of immune cell populations in the LV after MI. A,

Effects of Luc or AC modRNA-driven overexpression on caspase 3 cleavage in the LV 24 hours post MI. **B**, Volcano plot of the LV transcriptome of mice treated with Luc or AC modRNA; data obtained 4, 24 and 48 hours post MI. **C**, GO enrichment analysis for genes displaying significant ( $p < 0.05$ ) differences in expression between AC modRNA-treated and Luc modRNA-treated hearts 48 hours post MI. **D**, Hierarchical clustering dendrogram of genes upregulated in Luc modRNA-treated mice relative to sham-operated mice 48 hours post MI and genes downregulated in AC modRNA-treated hearts relative to Luc modRNA-treated hearts 48 hours post MI, plus hierarchical clustering dendrogram of the partial transcriptome for sphingolipids 48 hours post MI. **E-F**, Flow cytometric quantification of immune cell populations in the infarct zone of Luc modRNA and AC modRNA-treated hearts at 7 days (**E**) or 14 days (**F**) post MI includes neutrophils, total macrophages, MHCII<sup>-</sup> and MHCII<sup>+</sup> macrophage subpopulations and Ly6C<sup>low</sup> and Ly6C<sup>hi</sup> monocytes.  $n=2,4,4$  (B-D),  $n=9-12$  (E)  $n=11$  (F), Two-tailed Student's *t*-tests (F).

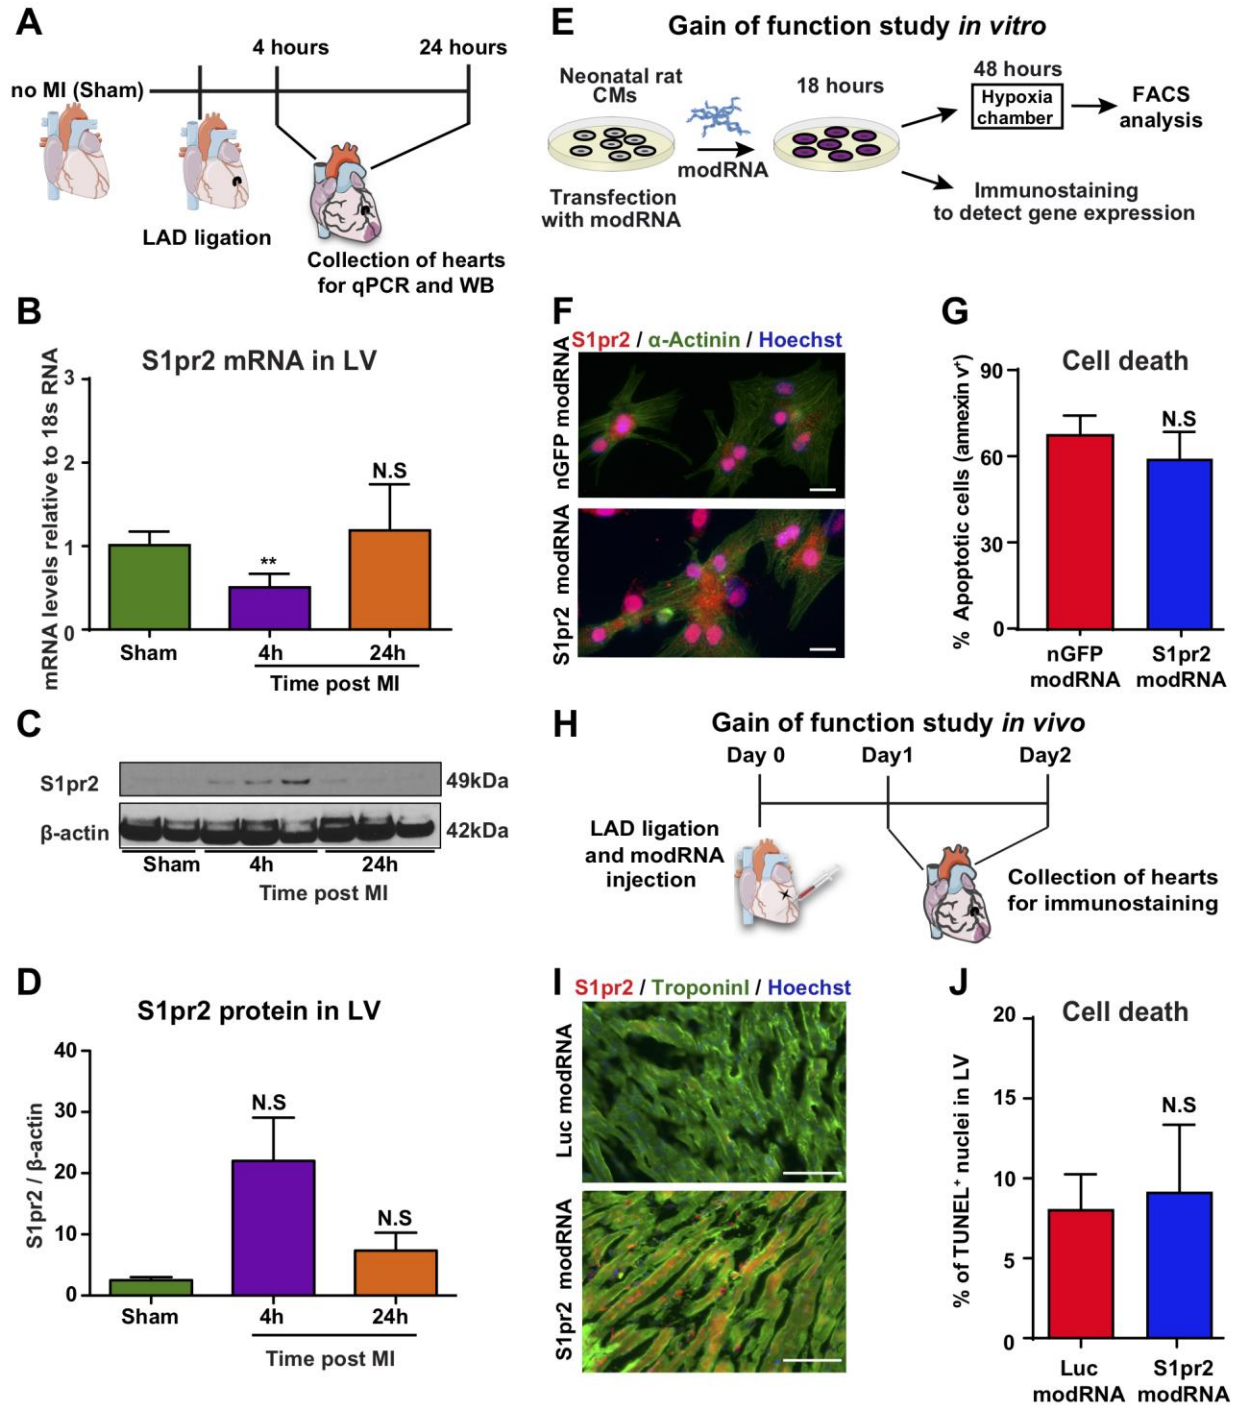

**Supplementary Figure S7. Effect of S1pr2 overexpression on cardiac cell death.**

**A**, To analyze changes in S1pr2 receptor expression, hearts were harvested from sham-operated mice or mice 4 hours or 24 hours post MI. Quantification of S1pr2 mRNA (**B**) and protein levels (**C&D**) in the LV of hearts harvested from sham-operated

mice or from mice 4 or 24 hours post MI. **E**, To investigate the effect of S1pr2 overexpression on nrCM cell death, cells were transfected with modRNAs encoding nGFP or S1pr2. **F**, 18 hours post transfection, cells were fixed and immunostained to confirm modRNA translation. **G**, Cell death assessment by FACS analysis of Annexin V<sup>+</sup> cell content within modRNA-transfected cells after 48 hours in a hypoxia chamber. **H**, modRNAs encoding Luc or S1pr2 were injected into mouse hearts at the time of MI. **I**, To confirm S1pr2 overexpression, hearts were collected 24 hours post MI and immunostained. **J**, To evaluate cell death, TUNEL assays were performed on heart tissue collected 48 hours post MI and modRNA injection. \*\*,  $P < 0.01$ ,  $n = 4$  (B),  $n = 2, 3, 3$  (C&D),  $n = 3$  (G&J),  $n = 3$  (J). One-way ANOVA, Tukey's Multiple Comparison Test (B&D), Two-tailed Student's t-test (G&J). Scale bar 10 $\mu$ m (F) and 50 $\mu$ m (I).

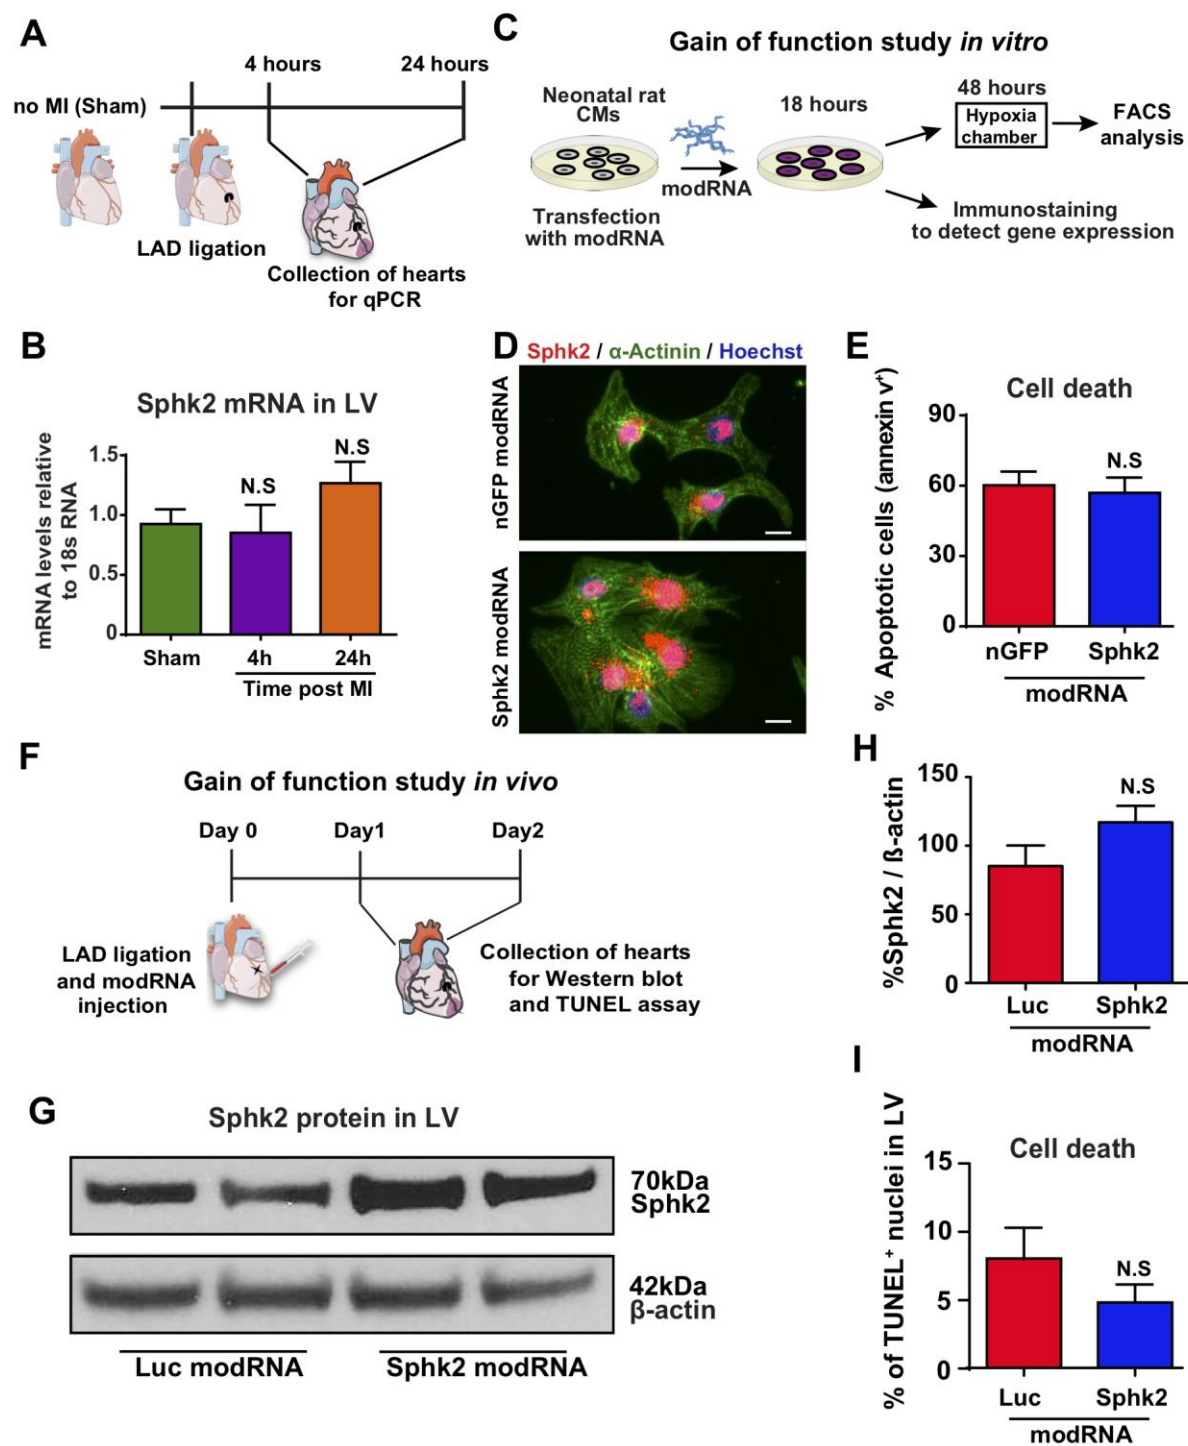

**Supplementary Figure S8. Effect of Sphk2 overexpression on cardiac cell death in ischemia *in vitro* and after MI.** A-B, Sphk2 mRNA level was measured using qPCR in hearts harvested from either sham-operated mice or mice 4 and 24 hours post MI. C,

nrCMs were transfected with modRNAs for nGFP or Sphk2. **D**, 18 hours post transfection, the cells were fixed and immunostained to confirm modRNA translation. **E**, Cell death assessment of nGFP modRNA- or Sphk2 modRNA-transfected cells by FACS analysis of Annexin V<sup>+</sup> cells after 48 hours in a hypoxia chamber. **F**, modRNAs for Luc or Sphk2 were injected into mouse hearts at the time of MI. **G-H**, 24 hours post MI and modRNA injection, hearts were collected and Sphk2 protein levels were measured using WB. **I**, 48 hours after MI and modRNA injection, hearts were harvested to evaluate cell death using TUNEL assay. NS, not significant, n=4 (B&I), n=3 (E), n=2 (H), n=6 (I). One-way ANOVA, Tukey's Multiple Comparison Test (B), Two-tailed Student's t-test (E, H&I). Scale bar 5µm.

#### **4. Supplementary Movies**

**Supplementary Movie 1. Cine MRI of infarcted heart transfected with Luc modRNA one month post MI.**

**Supplementary Movie 2. Cine MRI of infarcted heart transfected with AC modRNA one month post MI.**

#### **5. Author Contributions**

Y.H. designed and carried out most of the experiments, analyzed most of the data and wrote the manuscript; A.S.V. developed and performed AC activity assays, prepared samples for sphingolipid analysis and revised the manuscript; E.Y. performed experiments, prepared modRNAs and revised the manuscript; M.M.Z. performed and analyzed experiments regarding immune cell composition in the infarcted heart using FACS, wrote the manuscript and revised the manuscript; E.C. carried out all surgery and echocardiography on mice; N.S. and M.T.K.S prepared modRNAs; R.K. performed qPCR; A.A.K. cut and stained sections; A.M. isolated nrCM, stained slides and revised the manuscript; K.K. and N.G. performed western blots; A.F. analyzed MRI data; M.G.K. revised the manuscript; N.H. cut and stained tissues; E.K. provided advice and analyzed RNAseq data; N.C.G. generated human embryonic stem cell-derived cardiomyocytes; E.S. and R.H. provided advice and revised the manuscript; E.E. designed experiments, analyzed data and wrote the manuscript; L.Z. designed experiments, analyzed data and wrote the manuscript.
